1 **Rapid adaptation to elevated extracellular potassium in the**  
2 **pyloric circuit of the crab, *Cancer borealis***

3 Abbreviated title: Loss and recovery of circuit activity in high [K<sup>+</sup>]

4 Lily S. He\*, Mara C.P. Rue\*, Ekaterina O. Morozova\*, Daniel J. Powell, Eric J. James+,  
5 Manaswini Kar<sup>o</sup>, and Eve Marder

6

7 Biology Department and Volen Center, Brandeis University, Waltham, MA 02454

8 + Biology Department, Aldephi University, Garden City, NY 11530

9 <sup>o</sup> Department of Neurobiology, University of Pittsburgh, Pittsburgh, PA 15213

10 \* these authors contributed equally to this work

11 Corresponding author: Eve Marder: [marder@brandeis.edu](mailto:marder@brandeis.edu)

12

13 Number of pages: 42

14 Number of figures: 6

15 Abstract: 223 words

16 Introduction: 625 words

17 Discussion: 1484 words

18

19 The authors declare no conflicts of interest.

20

21 Acknowledgments: Supported by NSF Grant *R35 NS097343*. The authors would like to  
22 thank Daniel Shin for assistance with dissections, and Stephen Van Hooser for statistical  
23 advice, and Sonal Kedia and Jason Pipkin for careful reading of this manuscript.

24 **Abstract**

25 Elevated extracellular  $[K^+]$  is associated with many disorders including epilepsy,  
26 traumatic brain injury, ischemia and kidney failure. Experimentally, elevated  $[K^+]$  is  
27 used to increase excitability in neurons and networks, by shifting the potassium  
28 equilibrium potential ( $E_K$ ) and consequently, the resting membrane potential. We  
29 studied the effects of increased extracellular  $[K^+]$  on the well-described pyloric circuit of  
30 the crab, *Cancer borealis*, while recording pyloric network activity extracellularly and  
31 the activity of Pyloric Dilator neuron (PD) intracellularly. A 2.5-fold increase in  
32 extracellular  $[K^+]$  ( $2.5x[K^+]$ ) depolarized PD neurons and resulted in an unexpected  
33 short-term loss of their normal bursting activity. This period of silence was followed by  
34 the recovery of spiking and/or bursting activity during the continued superfusion of  
35  $2.5x[K^+]$  saline. In contrast, when PD neurons were pharmacologically isolated from  
36 pyloric presynaptic inputs, they exhibited no loss of spiking activity in  $2.5x[K^+]$ ,  
37 suggesting the existence of an acute inhibitory effect mediated by circuit interactions.  
38 Action potential threshold in PD neurons decreased markedly over the course of  
39 exposure to  $2.5x[K^+]$  concurrent with the recovery of spiking and/or bursting activity.  
40 This study illustrates a case of rapid adaptation to a global perturbation that is  
41 influenced by local synaptic connections. Moreover, the complex response of pyloric  
42 neurons to elevated  $[K^+]$  demonstrates that electrophysiological recordings are  
43 necessary to determine how neuronal and circuit activity are affected by altered  $K^+$   
44 concentrations.

45 **Significance Statement**

46 To characterize the sensitivity of a neuronal circuit to global perturbation, we tested the  
47 response of the well-described pyloric circuit of the crab stomatogastric ganglion to  
48 saline with elevated  $[K^+]$ . Unexpectedly, a 2.5-fold increase in extracellular  $[K^+]$  led to a  
49 temporary loss of activity in pyloric neurons that is not due to depolarization block. This  
50 was followed by a rapid increase in excitability and concurrent recovery of spiking  
51 activity within minutes. In contrast, when presynaptic inputs to pyloric neurons were  
52 blocked, there was no temporary loss of spiking activity in elevated  $[K^+]$ . This is a case of  
53 rapid adaptation that restores neuronal activity disrupted by global depolarization.

## 54 **Introduction**

55           Neuronal circuits must be robust to various environmental challenges. This is  
56 especially true for central pattern generators (CPGs) that produce essential motor  
57 patterns such as breathing, walking, and chewing (Marder and Calabrese, 1996).  
58 Maintaining stability over a range of perturbations involves multiple intrinsic and  
59 synaptic mechanisms that operate across minutes to days (Von Euler, 1983; Marder and  
60 Bucher, 2001; Harris-Warrick, 2010). Complicating matters, both theoretical and  
61 experimental evidence suggest that robust CPGs with similar activity patterns can have  
62 widely variable underlying cell intrinsic and synaptic conductances (Prinz et al., 2004;  
63 Marder and Goaillard, 2006; Schulz et al., 2006; Schulz et al., 2007; Goaillard et al.,  
64 2009; Norris et al., 2011; Roffman et al., 2011). These individually variable circuits,  
65 nevertheless, must be reliable, and it remains an open question how such circuits  
66 respond and adapt to environmental challenges.

67           In the context of neuronal circuits, global perturbations involve changes to  
68 properties of the environment in which the neurons reside and thus may exert a wide  
69 influence over most circuit neurons. For instance, changes in temperature and pH will  
70 influence cellular function by altering how basic biochemical processes occur. Global  
71 perturbations also include changes to the ionic composition of extracellular fluid that  
72 then alter the electrochemical driving forces important for neuronal activity. In  
73 particular, elevated extracellular potassium concentration ( $[K^+]$ ), is a physiologically  
74 relevant depolarizing stimulus associated with a wide array of conditions including  
75 thermal stress, epileptic seizures, kidney failure, traumatic brain injury, and stroke  
76 (Baylor and Nicholls, 1969; Katayama et al., 1990; Pérez-Pinzón et al., 1995; Jensen and  
77 Yaari, 1997; Rodgers et al., 2007; Krishnan and Kiernan, 2009; Morrison et al., 2011;

78 Arnold et al., 2014; Chauvette et al., 2016). Experimentally, increased extracellular  $[K^+]$   
79 is often used to induce changes in neuronal activity. For instance, in rodent  
80 hippocampal cultures, increased  $[K^+]$  were used to depolarize neurons and activate  
81 calcium-dependent transcription pathways (Lin et al., 2008; Sharma et al., 2015).  
82 Increased  $[K^+]$  is often applied to pre-Bötzinger complex neurons in acute slice  
83 preparations to reestablish rhythmic firing lost in the absence of excitatory inputs  
84 (Ballerini et al., 1999; Panaitescu et al., 2009; Ruangkittisakul et al., 2011; Rybak et al.,  
85 2014). Although our understanding of the basic depolarizing effect of increased  $[K^+]$  on  
86 neuronal membrane potential is well defined (Somjen, 1979), the circuit level and long-  
87 term consequences of global changes in  $[K^+]$  are less well understood. Here, we  
88 characterized the effects of increased  $[K^+]$  on a well described motor circuit of the crab,  
89 *Cancer borealis*.

90         The crustacean stomatogastric nervous system (STNS) has been extensively  
91 studied and is a highly advantageous system for the study of fundamental mechanisms  
92 of circuit dynamics, pattern generation, and neuromodulation (Selverston, 1976;  
93 Selverston and Moulins, 1987; Marder and Bucher, 2007; Marder et al., 2014). The  
94 combination of intrinsic variability, well-established connectivity, and production of  
95 behaviorally relevant fictive activity, make the STNS an attractive model to study  
96 underlying network dynamics and robustness in response to a global perturbation  
97 (Selverston and Miller, 1980; Eisen and Marder, 1982; Miller and Selverston, 1982;  
98 Selverston et al., 1982). Previous studies have shown that the pyloric rhythm of the  
99 STNS is extraordinarily robust to changes in both temperature and pH (Tang et al.,  
100 2010; Tang et al., 2012; Soofi et al., 2014; Marder et al., 2015; Haddad and Marder,  
101 2018; Haley et al., 2018; Kushinsky et al., 2019). Extracellular potassium concentrations

102 can act on all neurons in a circuit simultaneously and affect a multitude of cellular  
103 processes, making it an attractive model with which to study the effects of a global  
104 perturbation on neural circuits (Somjen, 2002; Misonou et al., 2004).

105 Here, we characterize the effects of elevated  $[K^+]$  on the pyloric rhythm and  
106 quantify the time course of these effects. We describe both some expected and  
107 unanticipated effects of the treatment.

## 108 **Materials and Methods**

### 109 Animals and dissections

110 Adult male Jonah Crabs, *Cancer borealis*, (N = 73) were obtained from Commercial  
111 Lobster (Boston, MA) between December 2016 and March 2019 and maintained in  
112 artificial seawater at 10-12 °C in a 12-hour light/dark cycle. On average, animals were  
113 acclimated at this temperature for one week before use. Prior to dissection, animals  
114 were placed on ice for at least 30 min. Dissections were performed as previously  
115 described (Gutierrez and Grashow, 2009). In short, the stomach was dissected from the  
116 animal and the intact stomatogastric nervous system (STNS) was removed from the  
117 stomach including the commissural ganglia, esophageal ganglion and stomatogastric  
118 ganglion (STG) with connecting motor nerves. The STNS was pinned in a Sylgard-  
119 coated (Dow Corning) dish and continuously superfused with 11 °C saline.

### 120 Solutions

121 Physiological *Cancer borealis* saline was composed of 440 mM NaCl, 11 mM KCl, 26  
122 mM MgCl<sub>2</sub>, 13 mM CaCl<sub>2</sub>, 11 mM Trizma base, 5 mM maleic acid, pH 7.4-7.5 at 23 °C  
123 (approximately 7.7-7.8 pH at 11 °C). High - 1.5x, 2x, 2.5x, and 3x[K<sup>+</sup>] - salines (16.5, 22,  
124 27.5 and 33mM KCl respectively) were prepared by adding more KCl salt to the normal  
125 saline formula. Picrotoxin (PTX) used to block glutamatergic synapses was added to  
126 normal or 2.5x[K<sup>+</sup>] saline at a 10<sup>-5</sup>M concentration for isolated pacemaker experiments  
127 (Marder and Eisen, 1984).

### 128 Electrophysiology

129 Intracellular recordings from somata were performed in the desheathed STG with 10–  
130 30 MΩ sharp glass microelectrodes filled with internal solution (10 mM MgCl<sub>2</sub>, 400 mM  
131 potassium gluconate, 10 mM HEPES buffer, 15 mM NaSO<sub>4</sub>, 20 mM NaCl (Hooper et al.,

2015). Intracellular signals were amplified with an Axoclamp 900A amplifier (Molecular Devices, San Jose). Extracellular nerve recordings were made by building wells around nerves using a mixture of Vaseline and mineral oil and placing stainless-steel pin electrodes within the wells to monitor spiking activity. Extracellular nerve recordings were amplified using model 3500 extracellular amplifiers (A-M Systems). Data were acquired using a Digidata 1440 digitizer (Molecular Devices, San Jose) and pClamp data acquisition software (Molecular Devices, San Jose, version 10.5). For identification of Pyloric Dilator (PD) and Lateral Pyloric (LP) neurons, somatic intracellular recordings were matched to action potentials on the pyloric dilator nerve (*pdn*), lateral pyloric nerve (*lpn*) and/or the lateral ventricular nerve (*lvn*).

#### Elevated [K<sup>+</sup>] saline application

Prior to all applications of elevated [K<sup>+</sup>] saline, baseline activity was recorded for 30 minutes in physiological saline. Following the baseline recording, the entire preparation was superfused with elevated [K<sup>+</sup>] saline in concentrations ranging from 1.5x to 3x [K<sup>+</sup>] for 90 minutes. The preparation was then washed with physiological saline for 30 minutes. Recordings from PD neurons in the isolated pacemaker kernel were made by superfusing with 10<sup>-5</sup>M Picrotoxin (PTX) saline until all inhibitory synaptic potentials in the PD neurons disappeared (for at least 20 minutes). These preparations were then exposed to 2.5x[K<sup>+</sup>] PTX saline for 90 minutes, followed by a 30-minute wash in PTX saline.

#### Threshold and excitability measurements

To measure the action potential threshold and excitability of PD neurons, two-electrode current clamp was used to apply slow ramps of current from -4nA to +2nA over 60s. Resting membrane potential and input resistance were measured during both baseline



156 conditions and after the application of elevated  $[K^+]$  to ensure the integrity of the  
157 preparation (neurons with input resistances  $<4M\Omega$  were discarded). Three ramps were  
158 performed during baseline at 10-minute intervals, and ramps were performed in  
159  $2.5x[K^+]$  at 5, 10, 20, 30, 40, 50, 60, 70, 80 and 90 minutes after the start of elevated  
160  $[K^+]$  superfusion. After the preparation was returned to physiological saline, three  
161 ramps were performed again at 10-minute intervals. In recordings from the PD neurons  
162 with glutamatergic synapses blocked by PTX, baseline ramps were performed as  
163 described above, followed by three ramps in PTX saline. Preparations were then  
164 superfused with  $2.5x[K^+]$  PTX saline and washed in PTX saline following the same ramp  
165 procedure as above.

#### 166 Data acquisition and analysis

167 Recordings were acquired using Clampex software (pClamp Suite by Molecular Devices,  
168 San Jose, version 10.5) and were visualized and analyzed using custom MATLAB  
169 waveform analysis scripts. These scripts were used to detect and measure voltage  
170 response amplitudes and membrane potentials, plot raw recordings and processed data,  
171 generate spectrograms, and perform some statistical analyses.

#### 172 Spectral analysis

173 Spectrograms were calculated using the Burg (1967) method for estimation of the power  
174 spectrum density in each time-window. The Burg method (1967) fits the autoregressive  
175 (AR) model of a specified order  $p$  in the time series by minimizing the sum of squares of  
176 the residuals. The fast-Fourier transform (FFT) spectrum is estimated using the  
177 previously calculated AR coefficients. This method is characterized by higher resolution  
178 in the frequency domain than traditional FFT spectral analysis, especially for a relative  
179 short time window (Buttkus, 2000). We used the following parameters for the spectral

180 estimation: data window of 3.2 s, 50% overlap to calculate spectrogram, number of  
181 estimated AR-coefficients  $p = \text{window}/4 + 1$ . Before the analysis, voltage traces were low  
182 pass filtered to 5 Hz using a six-order Butterworth filter and down-sampled. PD neuron  
183 burst frequency was calculated as the mean frequency at the peak spectral power in each  
184 sliding window.

### 185 *Analysis of interspike interval distributions*

186 Intracellular voltage traces were thresholded to obtain spike times. Distributions of  
187 inter-spike intervals (ISIs) were calculated within 2-minute bins. Hartigan's dip test of  
188 unimodality (Hartigan and Hartigan, 1985) was used to obtain the dip statistic for each  
189 of these distributions. This dip statistic was compared to Table 1 in Hartigan and  
190 Hartigan (1985) to find the probability of multi-modality. The test creates a unimodal  
191 distribution function that has the smallest value deviations from the experimental  
192 distribution function. The largest of these deviations is the dip statistic. The dip statistic  
193 shows the probability of the experimental distribution function being bimodal. Larger  
194 value dips indicate that the empirical data are more likely to have multiple modes  
195 (Hartigan and Hartigan, 1985).

### 196 *Activity pattern plots*

197 For all recordings, we determined the time of spikes over the course of the experiment.  
198 For the recovery time plots, silence was defined as no more than 2 spikes in a 30-second  
199 sliding window. Otherwise, all spike behaviors (even if irregular) were counted as active  
200 spiking.

201 To more broadly determine the activity pattern of each PD neuron across the  
202 experiment, we analyzed the distribution of inter-spike intervals (ISI) in 2-minute bins  
203 using Hartigan's dip statistic, as described above. If the dip statistic was 0.05 or higher

204 the neuron was considered to be bursting. If the dip statistic was lower than 0.05 the  
205 neuron was considered to be tonically firing. Neurons with some spikes, but not enough  
206 ISIs to calculate the dip, were classified as sparsely firing. Neurons with no ISIs in the  
207 observed window were classified as silent. We then plotted the activity pattern of the  
208 neuron in these four categories – bursting, tonic, sparse firing and silent – for each PD  
209 neuron across the entire experiment.

### 210 *Identification of the spike threshold*

211 The spike threshold was identified as the voltage point of the maximum curvature before  
212 the first spike. Specifically, we calculated the first derivative of the voltage ( $dV/dt$ ) and  
213 defined the spike onset as the point when  $dV/dt$  crosses the threshold value of 10  
214 mV/ms.

215 All electrophysiology analysis scripts are available at the Marder lab GitHub  
216 (<https://github.com/marderlab>).

## 217 **Results**

### 218 ***Network activity in the pyloric circuit***

219           The entire stomatogastric nervous system (STNS) of the crab *Cancer borealis*  
220 was isolated intact from the stomach and pinned in a dish, allowing us to change the  
221 composition of the continuously flowing superfused saline (Fig.1A). The stomatogastric  
222 ganglion (STG) contains identified neurons that drive the pyloric rhythm that filters  
223 food through the animal's foregut. Figure 1B illustrates the stereotypical triphasic  
224 pyloric pattern which is comprised of the activity from lateral pyloric (LP), pyloric (PY)  
225 and pyloric dilator (PD). The rhythm is recorded extracellularly from motor axons  
226 contained in the lateral ventricular nerve (*lvn*) and other nerves. Figure 1C illustrates  
227 the connectivity diagram of the pyloric network. The anterior burster (AB) neuron, the  
228 intrinsic oscillator that drives the circuit, is strongly electrically coupled to two PD  
229 neurons, which burst synchronously with the AB neuron. Together the AB and two PD  
230 neurons form the pacemaker kernel of the network, and their coordinated burst of  
231 spikes initiates each triphasic cycle (Maynard, 1972). Synaptic connections between  
232 neurons in the STG are all inhibitory and are both graded and spike mediated (Graubard  
233 et al., 1980; Manor et al., 1997). Rhythmic inhibition from the pacemaker drives  
234 bursting activity resulting from post-inhibitory rebound in the LP neuron and PY  
235 neurons which reciprocally inhibit each other (Hartline and Gassie, 1979; Selverston  
236 and Miller, 1980). As a result, LP bursting and PY bursting compose the second and  
237 third phases of the pyloric rhythm respectively.

238

### 239 ***The pyloric rhythm is disrupted by high extracellular potassium***

240 To test the response of the pyloric rhythm to changes in extracellular  $[K^+]$ , we  
241 switched from superfusion of normal physiological saline to superfusion of saline with  
242 elevated  $[K^+]$  over the STNS while continuously recording the activity of pyloric neurons  
243 extracellularly from the *l<sub>vn</sub>*. We tested concentrations of  $[K^+]$  that were 1.5, 2, 2.5 and 3-  
244 times physiological concentrations to study the dose-dependent responses of pyloric  
245 neurons to changes in extracellular  $[K^+]$ . When extracellular  $[K^+]$  was changed slightly,  
246 to 1.5x the physiological concentration (Fig. 1D, N = 4), the pyloric rhythm remained  
247 triphasic and was negligibly affected. When exposed to 2x  $[K^+]$  (Fig. 1E, N = 20), the  
248 response of pyloric neurons was more variable; in some cases (N = 9/20) there was a  
249 short disruption of the triphasic pyloric rhythm, which was followed by the recovery of  
250 spiking activity.

251 Higher concentrations of extracellular  $[K^+]$  produced more pronounced effects on  
252 pyloric activity. Superfusion of 2.5x  $[K^+]$  (Fig. 1F, N = 12 extracellular recordings)  
253 reliably and profoundly altered the pyloric rhythm. During the application of 2.5x $[K^+]$   
254 saline, all preparations exhibited a surprising disruption of action potentials from  
255 pyloric neurons, followed by recovery of spiking activity during continued exposure to  
256 2.5x $[K^+]$  saline. Similarly, application of 3x $[K^+]$  saline to the STNS resulted in consistent  
257 cessation of the pyloric rhythm (Fig. 1G, N = 5). However, at 3x $[K^+]$ , very few of the  
258 preparations recovered consistent activity. Based on these responses, we settled on a  
259 concentration of 2.5 times the control saline  $K^+$  concentration (2.5x $[K^+]$ ) for further  
260 study, which reliably disrupted the pyloric rhythm and was accompanied by a consistent  
261 recovery of spiking or bursting activity during the continued application of 2.5x $[K^+]$ .

262 The pattern of loss and recovery of pyloric activity in 2.5x $[K^+]$  saline was  
263 consistent across all experiments; however, the precise nature of each neuron's response

264 cannot be determined from extracellular data alone. Therefore, to obtain more detailed  
265 information on the effects of increased  $[K^+]$ , we recorded intracellularly from pyloric  
266 neurons while superfusing  $2.5x[K^+]$  saline over the STNS.

267

268 ***Pyloric neurons PD and LP depolarize and temporarily lose spiking***  
269 ***activity in high extracellular potassium***

270 With intracellular recordings, we saw a marked loss of spiking activity (crash) of  
271 pyloric neurons in response to the application of  $2.5x[K^+]$  saline that was consistent with  
272 the previously described extracellular recordings. In the representative example shown  
273 in Figure 2, the PD and LP neurons burst robustly in normal physiological saline (Fig.  
274 2*Ai*). Within a few minutes of the start of  $2.5x[K^+]$  saline application, the minimum  
275 membrane potential of the PD and LP neurons depolarized by 15 and 22mV respectively  
276 (Fig. 2*Aii*), which was coincident with a reduction in firing frequency. The activity of  
277 both the LP and PD neurons became more burst-like over the course of the 90-minute  
278 application of  $2.5x[K^+]$  saline (Fig. 2*Aiii-iv*) and recovered to normal baseline behavior  
279 when returned to physiological saline (Fig. 2*Av*). The pattern of depolarization and  
280 recovery of spiking can be more clearly depicted by plotting time-condensed voltage  
281 traces for the PD neuron (the response of the LP neuron closely resembles that of the PD  
282 neuron) for the entire 150 minute experiment. In this trace, the membrane potential  
283 depolarizes in  $2.5x[K^+]$  saline followed by a loss of spiking activity (Fig. 2*B*). To visualize  
284 spiking behavior over the course of the experiment, we plotted the instantaneous  
285 interspike intervals (ISI) of the PD neuron for the whole experiment on a log scale  
286 ( $\log_{10}(\text{ISIs})$ , Fig. 2*C*). All healthy PD neurons in physiological saline have regular  
287 bursting activity that yields a bimodal distribution of ISIs, reflecting the relatively longer

288 ISI period between bursts and the shorter ISIs of spikes within a burst. Although the  
289 initial depolarization in 2.5x[K<sup>+</sup>] saline caused a very brief increase in burst and spike  
290 frequency, the increase was immediately followed by a loss of all spiking activity (Fig.  
291 2C). Over the course of the 2.5x[K<sup>+</sup>] saline application, both the PD and LP neuron  
292 recovered rhythmic bursts of action potentials, which is clear from the re-emergence of  
293 two ISI bands (Fig. 2C). Bursting activity is suggestive of the re-appearance of slow  
294 membrane potential oscillations. These slow oscillations are best visualized by  
295 spectrograms of the neuron's membrane potential; recovery of bursting activity in  
296 elevated [K<sup>+</sup>] saline can be seen by the re-appearance of a strong frequency band in the  
297 voltage spectrogram (Fig. 2D). We then calculated the most hyperpolarized point of the  
298 membrane potential in each burst averaged over five-minute bins for all PD neurons to  
299 determine the overall depolarizing effect of 2.5x[K<sup>+</sup>] saline. Individual PD neurons  
300 depolarized upon application of 2.5x[K<sup>+</sup>] saline and remained depolarized throughout  
301 the application with no repolarization of the membrane potential (Fig. 2E). Over all  
302 preparations, PD neurons depolarized upon application of 2.5x[K<sup>+</sup>] saline (Fig. 2F,  
303 repeated measures ANOVA, Tukey post-hoc  $p < 0.05$ , average depolarization after 10  
304 minutes  $14.5 \pm 3.3\text{mV}$ ) After the initial change in the first 10 minutes in 2.5x[K<sup>+</sup>], the  
305 minimum membrane potentials did not change for the remainder of the elevated [K<sup>+</sup>]  
306 application ( $p > 0.05$ ). The minimum membrane potential returned to baseline levels  
307 when the preparations were returned to physiological saline (n.s.,  $p > 0.05$ ). The  
308 behavior of LP neurons in 2.5x[K<sup>+</sup>] was very similar to that of PD neurons; LP neurons  
309 depolarized by  $16.5 \pm 2.9\text{mV}$  after 10 minutes in 2.5x[K<sup>+</sup>] ( $n = 5$ ) and remained  
310 depolarized for the duration of the elevated [K<sup>+</sup>] application.

311

## 312 ***Variability in the response of PD neurons to 2.5x[K<sup>+</sup>] saline***

313        Although pyloric activity and circuit connectivity is highly conserved across  
314 animals, responses of individual PD neurons to 2.5x[K<sup>+</sup>] saline varied substantially  
315 across preparations. Superfusion of 2.5x[K<sup>+</sup>] saline led to a period of silence in 9 of the  
316 13 PD neurons, with striking variability in the duration of silence and extent of recovery  
317 across animals. Figure 3 shows the responses of four PD neurons from four different  
318 animals to a 90-minute application of 2.5x[K<sup>+</sup>] saline. Across all preparations (n = 13),  
319 the time of silence elicited by 2.5x[K<sup>+</sup>] saline application varied from 1 to 62 minutes  
320 (time of silence was  $10.9 \pm 5.8$  minutes SD). We characterized the recovery of PD  
321 neuron activity by comparing the ISI distributions over time. In some cases, the PD  
322 neurons exhibited only tonic firing activity in 2.5x[K<sup>+</sup>] saline which is reflected by the  
323 presence of a single ISI band (Fig. 3A, B). In other cases, PD neurons regained burst-like  
324 activity, which was reflected in the re-emergence of two ISI bands in 2.5x[K<sup>+</sup>] saline  
325 (Fig. 3C, D).

326        In all PD neuron recordings, the variable period of silence upon application of  
327 2.5x[K<sup>+</sup>] saline was followed by the recovery of spiking activity. For all PD neurons, we  
328 calculated the “time to recovery,” defined as the length of time between the silencing of  
329 the neuron and when the neuron recovered at least two action potentials in a 30-second  
330 sliding window during the application of 2.5x[K<sup>+</sup>] saline. We were interested in  
331 determining whether aspects of baseline activity of each PD neuron influenced the  
332 neuron’s time to recovery. Therefore, for each PD neuron, we calculated the mean  
333 minimum membrane potential during baseline recordings (Fig. 3E), the change in  
334 membrane potential upon application of 2.5x[K<sup>+</sup>] saline (Fig. 3F) and the baseline  
335 bursting frequency (Fig. 3G) and compared these values to the time to recovery for each



336 corresponding neuron. We found no correlation between any of these values and the  
337 time elapsed until recovery of spiking activity ( $R^2=0.203$ ,  $R^2=0.104$ ,  $R^2=0.012$   
338 respectively).

339

### 340 ***PD neurons in the isolated pacemaker kernel continue spiking in 2.5x[K<sup>+</sup>]***

#### 341 ***saline***

342 From the previous experiments, it was unclear to what extent the crash and  
343 recovery of activity in 2.5x[K<sup>+</sup>] saline was due to presynaptic inputs to PD neurons.  
344 Because the PD and AB neurons receive only glutamatergic input from other pyloric  
345 network neurons, the pacemaker kernel can be studied in isolation from the pyloric  
346 network neurons by superfusing saline with 10<sup>-5</sup>M picrotoxin (PTX), which blocks  
347 ionotropic glutamatergic synapses in the STG (Fig. 4A) (Bidaut, 1980).

348 The response of PD neurons in the presence of PTX (PTX(+)) to 2.5x[K<sup>+</sup>] saline  
349 was markedly different from the behavior of PD neurons in control conditions (in the  
350 absence of PTX) (PTX(-)). Figure 4 illustrates a representative example of the responses  
351 of PD neurons to 2.5x[K<sup>+</sup>] PTX saline; the preparation initially switched from rhythmic  
352 bursting to tonic spiking activity in 2.5x[K<sup>+</sup>] PTX saline (Fig. 4Biii), followed by recovery  
353 of bursting activity that became more pronounced with time (Fig. 4B iv – vi). There was  
354 no interruption of (firing) activity upon the superfusion of 2.5x[K<sup>+</sup>] PTX saline (Fig. 4C)  
355 in PD neurons as compared to 25.x[K<sup>+</sup>] alone. The recovery of bursting in 2.5x[K<sup>+</sup>] PTX  
356 saline can also be seen in the emergence of two distinct ISI bands (Fig. 4D) and the  
357 emergence of a robust frequency band in the spectrogram of the PD intracellular voltage  
358 trace (Fig. 4E).

359 We further quantified the response of PD neurons to 2.5x[K<sup>+</sup>] PTX saline by  
360 calculating the mean minimum membrane potential in five-minute bins for each neuron  
361 across the experiment (n = 8, Fig. 4F). Similar to PD neurons in the intact circuitry, all  
362 PTX(+) PD neurons depolarized in 2.5x[K<sup>+</sup>] saline (Fig. 4G, repeated measures ANOVA,  
363 Tukey post-hoc p < 0.05, average depolarization after 10 minutes 12.6 ± 3.0mV). The  
364 minimum membrane potential of PD neurons in PTX then remained stable during the  
365 application of 2.5x[K<sup>+</sup>] and returned to baseline levels when returned to physiological  
366 extracellular [K<sup>+</sup>] (Fig. 4G, p > 0.05). Importantly, the fact that PTX(+) PD neurons  
367 maintain tonic firing upon the application of 2.5x[K<sup>+</sup>] saline despite marked  
368 depolarization indicates that the crash observed in PTX(-) PD neurons is unlikely to be  
369 due to depolarization block.

370

### 371 ***Synaptic inputs alter response of PD neurons to 2.5x[K<sup>+</sup>] saline***

372 The initial responses of PD neurons to 2.5x[K<sup>+</sup>] saline application differed in the  
373 presence or absence of PTX. This difference indicates the existence of a circuit-driven  
374 response to elevated [K<sup>+</sup>]. To quantify this effect, we used values from the Hartigan's dip  
375 test on 2-minute bins of log(ISI) to determine the time that each PD neuron was either  
376 bursting, tonically firing, or silent throughout the experiment and plotted the activity of  
377 each PD neuron over time (see methods).

378 In the intact circuit, the majority (N = 9 of 13) of PD neurons exhibited a period  
379 of silence following the application of 2.5x[K<sup>+</sup>] saline, then recovered spiking activity  
380 over a variable amount of time (Fig. 5A). In 2.5x[K<sup>+</sup>] PTX saline, PD neurons either  
381 remained active or only briefly went silent, then demonstrated robust recovery of  
382 spiking or bursting activity (Fig. 5B). The average time of PD silence in 2.5x[K<sup>+</sup>] saline

383 was significantly different with the addition of PTX (Fig. 5C, Wilcoxon rank-sum test  $p =$   
384 0.013), as was the average time of PD sparse firing between PTX(+) and PTX(-) PD  
385 neurons (Fig. 5D, Wilcoxon rank-sum test  $p = 0.034$ ). In both the time of silence and  
386 sparse firing comparisons, the difference between PTX(+) and PTX(-) PD neurons was  
387 still significant when the largest point in the PTX(-) group was removed. Neither the  
388 average time of tonic firing (Fig. 5E, n.s.,  $p = 0.77$ ), nor the average time of burst firing  
389 significantly were significantly different in the presence or absence of PTX (Fig. 5F, n.s.,  
390  $p = 0.51$ ).

391

392 ***Excitability of PD neurons changes rapidly during exposure to 2.5x[K<sup>+</sup>]***  
393 ***saline***

394 We wished to see whether periods of silence in high K<sup>+</sup> were due to  
395 depolarization block. Therefore, we applied 60 second steady ramps of current from -  
396 4nA to +2nA to PD neurons at several time points during the period of silence elicited  
397 by application of 2.5x[K<sup>+</sup>] saline. In silent PD neurons, action potentials could always be  
398 induced by injecting positive current, indicating that this period of silence is not due to  
399 depolarization block (Fig. 6A, ramps at 5-minutes and 10-minutes).

400 To determine the excitability of PD neurons during application of 2.5x[K<sup>+</sup>], we  
401 repeated the slow current ramps from -4nA to +2nA at 5, 10, 20, 30, 40, 50, 60, 70, 80,  
402 and 90 minutes after the beginning of the 2.5x[K<sup>+</sup>] saline application in the presence or  
403 absence of PTX. In the representative example shown, there was a clear change in the  
404 number and frequency of spikes elicited in the PD neuron by the current ramp as a  
405 function of time in 2.5x[K<sup>+</sup>] saline (Fig. 6A). In addition, as time in 2.5x[K<sup>+</sup>] increased,

406 more spikes were elicited at the same membrane potentials during the current ramp  
407 (Fig. 6B).

408 For each individual PTX(-) preparation (N = 5), spike threshold became more  
409 hyperpolarized in the PD neuron as a function of time in 2.5x[K<sup>+</sup>] saline (Fig. 6C). In  
410 contrast, when the same current ramps were applied to PTX(+) PD neurons (N = 6),  
411 there was no clear trend in spike threshold as a function of time in 2.5x[K<sup>+</sup>] saline (Fig.  
412 6D). Across all PD neurons, we calculated the percent change in spike threshold from  
413 baseline for each current ramp. There was a significant drop in spike threshold over  
414 time for PD neurons in 2.5x[K<sup>+</sup>] saline between the 5-minute the 60 through 90-minute  
415 time points and also between the 10-minute and the 60 through 90-minute time points  
416 (Fig. 6F blue, one-way repeated measures ANOVA, Tukey Post-Hoc test, all  $p < 0.05$ ).  
417 For most of these neurons the biggest changes in firing rates and spike threshold  
418 occurred during the first 10 minutes of 2.5x[K<sup>+</sup>] saline application, which is similar to  
419 the time in which most PD neurons recover spiking activity in elevated [K<sup>+</sup>]. Across all  
420 PTX(+) PD neurons there was no significant percent change in spike threshold over  
421 time in 2.5x[K<sup>+</sup>] (Fig. 6G red, one-way repeated measures ANOVA, Tukey Post-Hoc test,  
422 n.s., all  $p > 0.05$ ).

423 To visualize overall changes in PD neuron excitability, we then calculated average  
424 F-I curves for all neurons at the beginning (5-minute ramp) and end (90-minute ramp)  
425 of the 2.5x[K<sup>+</sup>] saline application. Control PD neurons become more excitable as time in  
426 2.5x[K<sup>+</sup>] increases; there is a shift in the average F-I curve between the 5- and 90-  
427 minute time points (Fig. 6F solid lines, two-way repeated measures ANOVA,  $p = 0.009$ ).  
428 In addition, at the 5-minute time point in 2.5x[K<sup>+</sup>], PTX(+) PD neurons are more  
429 excitable than PTX(-) PD neurons (Fig 6F purple lines, two-way repeated measures

430 ANOVA,  $p = 0.036$ ). This initial difference in excitability is consistent with the fact that  
431 PTX(+) neurons remain active upon application of  $2.5x[K^+]$ , while PTX(-) PD neurons  
432 typically lose spiking activity. The excitability of PTX(+) PD neurons does not change  
433 over time in  $2.5x[K^+]$ ; there was no significant difference between the 5- and 90-minute  
434 PTX(+) PD neuron F-I curves (Fig 6F dashed lines, two-way repeated measures  
435 ANOVA,  $p = 0.097$ ). In addition, by the end of the  $2.5x[K^+]$  application (90-minutes),  
436 there was no significant difference between the F-I curves of PTX(+) and PTX(-) PD  
437 neurons (Fig 6F red lines, two-way repeated measures ANOVA,  $p = 0.375$ ).

438 **Discussion**

439 **Surprising inhibitory effect of a depolarizing stimulus**

440 In the STG, the pyloric rhythm is robust to multiple perturbations including  
441 changes in temperature, pH and neuromodulatory state (Tang et al., 2010; Tang et al.,  
442 2012; Temporal et al., 2014; Hamood et al., 2015; Haddad and Marder, 2018; Haley et  
443 al., 2018). Here, we tested whether pyloric neurons are similarly robust to global  
444 depolarization through changes to extracellular  $[K^+]$ . It is generally assumed that  
445 positive current input or depolarization of a neuron's membrane potential will lead to an  
446 increase in neuronal activity, and that extreme depolarizations can lead to loss of  
447 activity through depolarization block. Instead, we found a type of transient neuronal  
448 silence in response to elevated  $[K^+]$  that is not due to a depolarization block.

449 In the pyloric circuit, all local synaptic connections are inhibitory (Eisen and  
450 Marder, 1982; Miller and Selverston, 1982). Synaptic transmission in the STG is both  
451 graded and spike-mediated, meaning that action potentials are not required for  
452 inhibitory synapses to function (Graubard et al., 1980; Manor et al., 1997; Nadim et al.,  
453 1997). Therefore, the observed decrease in both bursting and spiking activity in elevated  
454 extracellular  $[K^+]$  may be caused by global depolarization leading to an increase in  
455 graded inhibition that suppresses spiking and bursting activity. In support of this  
456 theory, elevated  $[K^+]$  does not have the same inhibitory effect on PD neurons with  
457 glutamatergic synapses blocked compared to PD neurons with intact synaptic  
458 connections. Similarly, in the proprioceptive neurons of the blue crab and the muscle  
459 receptor organ of the crayfish, it was recently reported that increased  $[K^+]$  also has an  
460 inhibitory effect at concentrations not thought to cause a depolarization block (Malloy et  
461 al., 2017).

462

### 463 **Adaptation to global perturbation**

464         The PD/AB pacemaker unit of the pyloric circuit exhibited rapid adaptation to  
465 the disruptive stimulus of increased extracellular  $[K^+]$ . Although the triphasic pyloric  
466 rhythm was not fully restored in  $2.5x[K^+]$  saline, PD neurons exhibited rapid changes in  
467 excitability over several minutes, which corresponded to the recovery of spiking and, in  
468 many cases, bursting activity.

469         Classical homeostatic plasticity takes place over hours to days and requires  
470 changes in intracellular calcium concentrations which then subsequently drive changes  
471 in gene expression, leading to cell-intrinsic changes in excitability (Desai et al., 1999;  
472 Cudmore and Turrigiano, 2004; Turrigiano, 2012). There is evidence that this  
473 mechanism can be induced by changes in extracellular  $[K^+]$ . Rat myenteric neurons  
474 cultured in elevated  $[K^+]$  serum for several days exhibit long-lasting changes in  $Ca^{2+}$   
475 channel function (Franklin, 1992). Similarly, culturing rat hippocampal pyramidal cells  
476 in high  $[K^+]$  medium for several days leads to activation of calcium-dependent changes  
477 in input resistance and the resting membrane potential that regulates the intrinsic  
478 excitability of the neurons (O'Leary et al., 2010). Changes in  $K^+$  channel densities are  
479 also associated with homeostatic regulation of neuronal activity. Depolarization of  
480 crustacean motor neurons with current pulses for several hours alters  $K^+$  channel  
481 densities in a cell-specific manner through a calcium-dependent mechanism (Golowasch  
482 et al., 1999). In addition, cerebellar granule cells in which inhibitory GABA receptors are  
483 blocked for several days maintain their response to excitatory input by strengthening  
484 voltage-independent  $K^+$  conductances (Brickley et al., 2001). Adaptation to global  
485 perturbation over several hours to days is well described by models via calcium signals

486 that influence expression levels of ion channels (O'Leary et al., 2014; O'Leary, 2018).  
487 Pyloric neurons in the STG also exhibit these long-term adaptations; preparations in  
488 which neuromodulatory inputs are removed initially lose rhythmicity and gradually  
489 recover over the course of several days (Thoby-Brisson and Simmers, 1998, 2002;  
490 Luther et al., 2003; Gray and Golowasch, 2016; Gray et al., 2017).

491 Intriguingly, many cases of rapid adaptation in neuronal circuits are related to  
492 changes in signaling between neurons. At the *Drosophila* neuromuscular junction,  
493 blocking glutamatergic signaling results in long-lasting changes in synaptic strength  
494 within minutes (Frank et al., 2006; Müller and Davis, 2012; Müller et al., 2012). In the  
495 crustacean cardiac ganglion, blocking delayed rectifier K<sup>+</sup> currents led to adaptation of  
496 the circuit and an increase in electrical coupling strength within one hour (Lane et al.,  
497 2016). Although these rapid changes in synaptic strength are often associated with  
498 Hebbian plasticity and learning, rapid alterations in synapses can also lead to a  
499 homeostatic-like maintenance of circuit activity.

500 The rapid adaptation of PD neurons in elevated extracellular [K<sup>+</sup>] is most likely  
501 due to a combination of cell-intrinsic conductance changes and synaptic modulation. In  
502 crustacean motor neurons, cell-intrinsic changes in current densities have been shown  
503 to be modulated by second-messenger kinase pathways activated by global  
504 depolarization (Ransdell et al., 2012). Rapid changes in circuit state could also be  
505 influenced by neuromodulation, as these experiments were conducted with the entire  
506 STNS, including connections to the upstream modulatory ganglia which were also  
507 exposed to the elevated [K<sup>+</sup>]. In the STNS, the upstream commissural ganglia and the  
508 esophageal ganglion release a wide range of neuromodulators onto the STG that affect  
509 excitability of cells and the pyloric rhythm (Marder and Bucher, 2007; Marder, 2012). In



510 particular, proctolin released by the MPN and MCN1 neurons endogenously drives the  
511 pyloric pacemaker neuron AB (Hooper and Marder, 1987; Nusbaum and Marder, 1989;  
512 Wood et al., 2000; Stein et al., 2007). Dopamine is also released by modulatory neurons  
513 in the STNS, and exogenous application of dopamine can cause rapid changes in  
514 electrical coupling strength and has been shown to rapidly regulate potassium currents  
515 in both mammalian and invertebrate neurons (Tornqvist et al., 1988; Harris-Warrick et  
516 al., 1998; Gruhn et al., 2005; Rodgers et al., 2013).

517

### 518 **Variable responses to similar perturbations**

519 The effects of perturbations are often represented by averaging the experimental  
520 results from a number of individuals, but there are several reasons why this approach is  
521 not always appropriate. Circuits with apparently identical outputs under control  
522 conditions can present distinctly different responses to perturbation due to underlying  
523 differences in network parameters (Tang et al., 2012; Hamood and Marder, 2014;  
524 Haddad and Marder, 2018; Haley et al., 2018; Alonso and Marder, 2019). Indeed, in this  
525 study we observed a wide range of responses in identified PD neurons to the same  
526 experimental conditions,  $2.5x[K^+]$ , which may uncover individual differences that are  
527 not evident during control conditions. Within the STG, conductance densities and  
528 strengths of synaptic connections can vary up to five-fold in magnitude between  
529 individuals (Schulz et al., 2006; Schulz et al., 2007; Goillard et al., 2009; Shruti et al.,  
530 2014; Temporal et al., 2014). Variability in neuronal conductances underlying similar  
531 activity patterns has also been demonstrated across phyla (Swensen and Bean, 2005;  
532 Nelson and Turrigiano, 2008; Tran et al., 2019). In addition, computational modeling of  
533 the pyloric network revealed that multiple combinations of independent circuit

534 parameters can give rise to functionally identical activity patterns (Goldman et al., 2001;  
535 Prinz et al., 2004; Taylor et al., 2009; Marder et al., 2015). The application of elevated  
536  $[K^+]$  saline to identified STG neurons provides additional evidence that differences in  
537 individual conductance parameters influence circuit responses to global perturbation  
538 (Alonso and Marder, 2019).

539

#### 540 **Implications for disease states**

541 Hyperkalemia is well documented in many nervous system disorders; however, it  
542 remains unclear how the changes in  $[K^+]$  acutely affect neuronal activity. Chronic Kidney  
543 Disease (CKD) leads to increases in serum  $[K^+]$  up to three times normal levels, directly  
544 affecting neuronal excitability, and changes in neuronal properties (Krishnan and  
545 Kiernan, 2009; Arnold et al., 2014). Similarly, increased activity of a group of neurons  
546 can increase the extracellular  $[K^+]$  in the surrounding tissue (Baylor and Nicholls, 1969;  
547 Kříž et al., 1974) and epileptic seizures and brain trauma can lead to increases in  $[K^+]$  in  
548 surrounding brain regions (Moody et al., 1974; Katayama et al., 1990; Silver and  
549 Erecinska, 1994; Fröhlich et al., 2008). These transient changes in extracellular  $[K^+]$   
550 have been tied to long lasting changes in the organization and phosphorylation pattern  
551 of  $K^+$  channels (Misonou et al., 2004), which could lead to long-lasting changes in circuit  
552 function (Somjen, 2001, 2002; Rodgers et al., 2007).

553 In this study, pyloric neurons respond to elevated  $[K^+]$  with a rapid adaptation of  
554 excitability; another example of how the such adaptations occur. The fast adaptation of  
555 pyloric neurons to global changes in  $[K^+]$  also suggests that rapid swings in  $[K^+]$  may be  
556 more damaging to neurons than gradual shifts or sustained changes in concentration.

557

558 **Reassessing global perturbation**

559           The results of this study highlight the unexpected complexity of seemingly simple  
560 perturbations. In this classical manipulation of increased extracellular  $[K^+]$  we observed  
561 a paradoxical decrease in the activity of PD neurons upon bath application of high  $[K^+]$ ,  
562 followed by a recovery of activity in a short period time. Despite knowing the network  
563 connectivity, circuit properties and behavior of identified neurons within the STG, we  
564 were still unable to predict or fully explain the effects of increased  $[K^+]$  on circuit  
565 performance. The complex interaction between circuit level effects and cell intrinsic  
566 responses to simple changes in ion concentrations underscores the importance of  
567 recording and reporting neuronal activity during such manipulations in any experiment.

568 **References**

- 569 Alonso LM, Marder E (2019) Visualization of currents in neural models with similar behavior and  
570 different conductance densities. *eLife* 8:e42722.
- 571 Arnold R, Pussell BA, Howells J, Grinius V, Kiernan MC, Lin CSY, Krishnan AV (2014) Evidence for  
572 a causal relationship between hyperkalaemia and axonal dysfunction in end-stage  
573 kidney disease. *Clin Neurophysiol* 125:179-185.
- 574 Ballerini L, Galante M, Grandolfo M, Nistri A (1999) Generation of rhythmic patterns of activity  
575 by ventral interneurons in rat organotypic spinal slice culture. *J Physiol* 517:459-475.
- 576 Baylor DA, Nicholls JG (1969) Changes in extracellular potassium concentration produced by  
577 neuronal activity in the central nervous system of the leech. *J Physiol* 203:555-569.
- 578 Bidaut M (1980) Pharmacological dissection of pyloric network of the lobster stomatogastric  
579 ganglion using picrotoxin. *J Neurophysiol* 44:1089-1101.
- 580 Brickley SG, Revilla V, Cull-Candy SG, Wisden W, Farrant M (2001) Adaptive regulation of  
581 neuronal excitability by a voltage- independent potassium conductance. *Nature* 409:88-  
582 92.
- 583 Burg JP (1967) Maximum entropy spectral analysis. In: Proc. 37th Meeting Society of  
584 Exploration Geophysicist. Oklahoma City, OK.
- 585 Buttkus B (2000) Spectral Analysis and Filter Theory. Berlin: Springer.
- 586 Chauvette S, Soltani S, Seigneur J, Timofeev I (2016) *In vivo* models of cortical acquired epilepsy.  
587 *Neurosci Methods* 260:185-201.
- 588 Cudmore RH, Turrigiano GG (2004) Long-term potentiation of intrinsic excitability in LV visual  
589 cortical neurons. *J Neurophysiol* 92:341-348.

- 590 Desai NS, Rutherford LC, Turrigiano GG (1999) Plasticity in the intrinsic excitability of cortical  
591 pyramidal neurons. *Nat Neurosci* 2:515.
- 592 Eisen JS, Marder E (1982) Mechanisms underlying pattern generation in lobster stomatogastric  
593 ganglion as determined by selective inactivation of identified neurons. III. Synaptic  
594 connections of electrically coupled pyloric neurons. *J Neurophysiol* 48:1392-1415.
- 595 Frank CA, Kennedy MJ, Goold CP, Marek KW, Davis GW (2006) Mechanisms underlying the  
596 rapid induction and sustained expression of synaptic homeostasis. *Neuron* 52:663-677.
- 597 Franklin JL (1992) Long-term Regulation of Neuronal Calcium Currents by Prolonged Changes of  
598 Membrane Potential. *J Neurosci* 12:1726-1735.
- 599 Fröhlich F, Bazhenov M, Iragui-Madoz V, Sejnowski TJ (2008) Potassium dynamics in the  
600 epileptic cortex: new insights on an old topic. *The Neuroscientist* 14:422-433.
- 601 Goaillard J-M, Taylor AL, Schulz DJ, Marder E (2009) Functional consequences of animal-to-  
602 animal variation in circuit parameters. *Nat Neurosci* 12:1424-1430.
- 603 Goldman MS, Golowasch J, Marder E, Abbott L (2001) Global structure, robustness, and  
604 modulation of neuronal models. *J Neurosci* 21:5229-5238.
- 605 Golowasch J, Abbott LF, Marder E (1999) Activity-dependent regulation of potassium currents  
606 in an identified neuron of the stomatogastric ganglion of the crab *Cancer borealis*. *J*  
607 *Neurosci* 19:RC33-RC33.
- 608 Graubard K, Raper JA, Hartline DK (1980) Graded synaptic transmission between spiking  
609 neurons. *Proc Natl Acad Sci USA* 77:3733-3735.
- 610 Gray M, Golowasch J (2016) Voltage dependence of a neuromodulator-activated ionic current.  
611 *eneuro* 3.

- 612 Gray M, Daudelin DH, Golowasch J (2017) Activation mechanism of a neuromodulator-gated  
613 pacemaker ionic current. *J Neurophysiol* 118:595-609.
- 614 Gruhn M, Guckenheimer J, Land B, Harris-Warrick RM (2005) Dopamine modulation of two  
615 delayed rectifier potassium currents in a small neural network. *J Neurophysiol* 94:2888-  
616 2900.
- 617 Gutierrez GJ, Grashow RG (2009) *Cancer borealis* stomatogastric nervous system dissection.  
618 *JoVE (J Vis Exp)*:e1207.
- 619 Haddad SA, Marder E (2018) Circuit robustness to temperature perturbation is altered by  
620 neuromodulators. *Neuron* 100:609-623. e603.
- 621 Haley JA, Hampton D, Marder E (2018) Two central pattern generators from the crab, *Cancer*  
622 *borealis*, respond robustly and differentially to extreme extracellular pH. *eLife* 7:e41877.
- 623 Hamood AW, Marder E (2014) Animal-to-Animal Variability in Neuromodulation and Circuit  
624 Function. *Cold Spring Harbor Symp Quant Biol* 79:21-28.
- 625 Hamood AW, Haddad SA, Otopalik AG, Rosenbaum P, Marder E (2015) Quantitative  
626 reevaluation of the effects of short- and long-term removal of descending modulatory  
627 inputs on the pyloric rhythm of the crab, *Cancer borealis*. *eNeuro* 2:0058-0014.
- 628 Harris-Warrick RM (2010) General principles of rhythmogenesis in central pattern generator  
629 networks. *Prog Brain Research* 187:213-222.
- 630 Harris-Warrick RM, Johnson BR, Peck JH, Kloppenburg P, Ayali A, Skarbinski J (1998) Distributed  
631 Effects of Dopamine Modulation in the Crustacean Pyloric Network a. *Annals of the New*  
632 *York Academy of Sciences* 860:155-167.
- 633 Hartigan JA, Hartigan PM (1985) The dip test of unimodality. *Ann Stat* 13:70-84.

- 634 Hartline DK, Gassie DV, Jr. (1979) Pattern generation in the lobster (*Panulirus*) stomatogastric  
635 ganglion. I. Pyloric neuron kinetics and synaptic interactions. *Biol Cybern* 33:209-222.
- 636 Hooper SL, Marder E (1987) Modulation of the lobster pyloric rhythm by the peptide proctolin. *J*  
637 *Neurosci* 7:2097-2112.
- 638 Hooper SL, Thuma JB, Guschlbauer C, Schmidt J, Büschges A (2015) Cell dialysis by sharp  
639 electrodes can cause nonphysiological changes in neuron properties. *J Neurophysiol*  
640 114:1255-1271.
- 641 Jensen MS, Yaari Y (1997) Role of intrinsic burst firing, potassium accumulation, and electrical  
642 coupling in the elevated potassium model of hippocampal epilepsy. *J Neurophysiol*  
643 77:1224-1233.
- 644 Katayama Y, Becker DP, Tamura T, Hovda DA (1990) Massive increases in extracellular  
645 potassium and the indiscriminate release of glutamate following concussive brain injury.  
646 *J Neurosurgery* 73:889-900.
- 647 Krishnan AV, Kiernan MC (2009) Neurological complications of chronic kidney disease. *Nat Rev*  
648 *Neurol* 5:542-551.
- 649 Kříž N, Syková E, Ujec E, Vyklický L (1974) Changes of of extracellular potassium concentration  
650 induced by neuronal activity in the spinal cord of the cat. *J Physiol* 238:1-15.
- 651 Kushinsky D, Morozova E, Marder E (2019) *In vivo* effects of temperature on the heart and  
652 pyloric rhythms in the Crab, *Cancer borealis*. *J Exp Biol* 222:jeb199190.
- 653 Lane BJ, Samarth P, Ransdell JL, Nair SS, Schulz DJ (2016) Synergistic plasticity of intrinsic  
654 conductance and electrical coupling restores synchrony in an intact motor network.  
655 *eLife* 5:e16879.

- 656 Lin Y, Bloodgood BL, Hauser JL, Lapan AD, Koon AC, Kim T-K, Hu LS, Malik AN, Greenberg ME  
657 (2008) Activity-dependent regulation of inhibitory synapse development by Npas4.  
658 Nature 455:1198-1204.
- 659 Luther JA, Robie AA, Yarotsky J, Reina C, Marder E, Golowasch J (2003) Episodic bouts of activity  
660 accompany recovery of rhythmic output by a neuromodulator-and activity-deprived  
661 adult neural network. J Neurophysiol 90:2720-2730.
- 662 Malloy C, Dayaram V, Martha S, Alvarez B, Chukwudolue I, Dabbain N, Mahmood DD, Goleva S,  
663 Hickey T, Ho A (2017) The effects of potassium and muscle homogenate on  
664 proprioceptive responses in crayfish and crab. J Exp Zool 327:366-379.
- 665 Manor Y, Nadim F, Abbott L, Marder E (1997) Temporal dynamics of graded synaptic  
666 transmission in the lobster stomatogastric ganglion. J Neurosci 17:5610-5621.
- 667 Marder E (2012) Neuromodulation of neuronal circuits: back to the future. Neuron 76:1-11.
- 668 Marder E, Eisen JS (1984) Transmitter identification of pyloric neurons: electrically coupled  
669 neurons use different transmitters. J Neurophysiol 51:1345-1361.
- 670 Marder E, Calabrese RL (1996) Principles of rhythmic motor pattern generation. Physiol Rev  
671 76:687-717.
- 672 Marder E, Bucher D (2001) Central pattern generators and the control of rhythmic movements.  
673 Curr Biol 11:R986-R996.
- 674 Marder E, Goaillard JM (2006) Variability, compensation and homeostasis in neuron and  
675 network function. Nat Rev Neurosci 7:563-574.
- 676 Marder E, Bucher D (2007) Understanding circuit dynamics using the stomatogastric nervous  
677 system of lobsters and crabs. Annu Rev Physiol 69:291-316.



- 678 Marder E, Goeritz ML, Otopalik AG (2015) Robust circuit rhythms in small circuits arise from  
679 variable circuit components and mechanisms. *Curr Opin Neurobiol* 31:156-163.
- 680 Marder E, Goeritz ML, Gutierrez GJ, Hamood A, Brookings T, Caplan J, Haddad S, Kispersky T,  
681 Shruti S (2014) The Crustacean Stomatogastric Nervous System. *Nervous Systems and*  
682 *Control of Behavior* 3:337-361.
- 683 Maynard DM (1972) Simpler networks. *Annals of the New York Academy of Sciences* 193:59-72.
- 684 Miller JP, Selverston AI (1982) Mechanisms underlying pattern generation in lobster  
685 stomatogastric ganglion as determined by selective inactivation of identified neurons.  
686 IV. Network properties of pyloric system. *J Neurophysiol* 48:1416-1432.
- 687 Misonou H, Mohapatra DP, Park EW, Leung V, Zhen D, Misonou K, Anderson AE, Trimmer JS  
688 (2004) Regulation of ion channel localization and phosphorylation by neuronal activity.  
689 *Nat Neurosci* 7:711-718.
- 690 Moody WJ, Jr. , Futamachi KJ, Prince DA (1974) Extracellular potassium activity during  
691 epileptogenesis. *Exp Neurol* 42:248-263.
- 692 Morrison B, III, Elkin BS, Dollé J-P, Yarmush ML (2011) In vitro models of traumatic brain injury.  
693 *Ann Rev Biomedical Engineering* 13:91-126.
- 694 Müller M, Davis GW (2012) Transsynaptic control of presynaptic Ca<sup>2+</sup> influx achieves  
695 homeostatic potentiation of neurotransmitter release. *Curr Biol* 22:1102-1108.
- 696 Müller M, Liu KSY, Sigrist SJ, Davis GW (2012) RIM controls homeostatic plasticity through  
697 modulation of the readily-releasable vesicle pool. *J Neurosci* 32:16574-16585.

- 698 Nadim F, Manor Y, Abbott L, Marder E (1997) Strength and timing of graded synaptic  
699 transmission depend on frequency and shape of the presynaptic waveform. In:  
700 Computational Neuroscience, pp 19-22: Springer.
- 701 Nelson SB, Turrigiano GG (2008) Strength through diversity. *Neuron* 60:477-482.
- 702 Norris BJ, Wenning A, Wright TM, Calabrese RL (2011) Constancy and variability in the output of  
703 a central pattern generator. *J Neurosci* 31:4663-4674.
- 704 Nusbaum MP, Marder E (1989) A modulatory proctolin-containing neuron (MPN). I.  
705 Identification and characterization. *J Neurosci* 9:1591-1599.
- 706 O'Leary T, Williams AH, Franci A, Marder E (2014) Cell types, network homeostasis, and  
707 pathological compensation from a biologically plausible ion channel expression model.  
708 *Neuron* 82:809-821.
- 709 O'Leary T (2018) Homeostasis, failure of homeostasis and degenerate ion channel regulation.  
710 *Curr Opin Physiol* 2:129-138.
- 711 O'Leary T, van Rossum MCW, Wyllie DJA (2010) Homeostasis of intrinsic excitability in  
712 hippocampal neurones: dynamics and mechanism of the response to chronic  
713 depolarization: Homeostatic regulation of intrinsic excitability. *J Physiol* 588:157-170.
- 714 Panaitescu B, Ruangkittisakul A, Ballanyi K (2009) Silencing by raised extracellular  $Ca^{2+}$  of pre-  
715 Bötzing complex neurons in newborn rat brainstem slices without change of  
716 membrane potential or input resistance. *Neurosci Lett* 456:25-29.
- 717 Pérez-Pinzón M, Tao L, Nicholson C (1995) Extracellular potassium, volume fraction, and  
718 tortuosity in rat hippocampal CA1, CA3, and cortical slices during ischemia. *J*  
719 *Neurophysiol* 74:565-573.

- 720 Prinz AA, Bucher D, Marder E (2004) Similar network activity from disparate circuit parameters.  
721 Nat Neurosci 7:1345-1352.
- 722 Ransdell JL, Nair SS, Schulz DJ (2012) Rapid homeostatic plasticity of intrinsic excitability in a  
723 central pattern generator network stabilizes functional neural network output. J  
724 Neurosci 32:9649-9658.
- 725 Rodgers CI, Armstrong GA, Shoemaker KL, LaBrie JD, Moyes CD, Robertson RM (2007) Stress  
726 preconditioning of spreading depression in the locust CNS. PLoS One 2:e1366.
- 727 Rodgers EW, Krenz W-D, Jiang X, Li L, Baro DJ (2013) Dopaminergic tone regulates transient  
728 potassium current maximal conductance through a translational mechanism requiring  
729 D1Rs, cAMP/PKA, Erk and mTOR. BMC Neurosci 14:143.
- 730 Roffman RC, Norris BJ, Calabrese RL (2011) Animal-to-animal variability of connection strength  
731 in the leech heartbeat central pattern generator. J Neurophysiol 107:1681-1693.
- 732 Ruangkittisakul A, Panaitescu B, Ballanyi K (2011) K<sup>+</sup> and Ca<sup>2+</sup> dependence of inspiratory-related  
733 rhythm in novel "calibrated" mouse brainstem slices. Respir Physiol Neurobiol 175:37-  
734 48.
- 735 Rybak IA, Molkov YI, Jasinski PE, Shevtsova NA, Smith JC (2014) Rhythmic Bursting in the Pre-  
736 Bötzing Complex. In: Progress in Brain Research, pp 1-23: Elsevier.
- 737 Schulz DJ, Goillard J-M, Marder E (2006) Variable channel expression in identified single and  
738 electrically coupled neurons in different animals. Nat Neurosci 9:356-362.
- 739 Schulz DJ, Goillard JM, Marder EE (2007) Quantitative expression profiling of identified  
740 neurons reveals cell-specific constraints on highly variable levels of gene expression.  
741 Proc Natl Acad Sci USA 104:13187-13191.

- 742 Selverston A, Moulins M (1987) Comparison with other systems. In: The Crustacean  
743 Stomatogastric System, pp 307-313. Berlin: Springer.
- 744 Selverston AI (1976) Neuronal mechanisms for rhythmic motor pattern generation in a simple  
745 system. In: Neural control of locomotion, pp 377-399. Boston, MA: Springer.
- 746 Selverston AI, Miller JP (1980) Mechanisms underlying pattern generation in lobster  
747 stomatogastric ganglion as determined by selective inactivation of identified neurons. I.  
748 Pyloric system. *J Neurophysiol* 44:1102-1121.
- 749 Selverston AI, Miller JP, Wadepuhl M (1982) Local circuits for the generation of rhythmic motor  
750 patterns. *Journal de Physiologie* 78:748-754.
- 751 Sharma N, Gabel Harrison W, Greenberg Michael E (2015) A Shortcut to Activity-Dependent  
752 Transcription. *Cell* 161:1496-1498.
- 753 Shruti S, Schulz DJ, Lett KM, Marder E (2014) Electrical coupling and innexin expression in the  
754 stomatogastric ganglion of the crab *Cancer borealis*. *J Neurophysiol* 112:2946-2958.
- 755 Silver IA, Erecinska M (1994) Extracellular glucose concentration in mammalian brain:  
756 continuous monitoring of changes during increased neuronal activity and upon  
757 limitation in oxygen supply in normo-, hypo-, and hyperglycemic animals. *J Neurosci*  
758 14:5068-5076.
- 759 Somjen GG (1979) Extracellular potassium in the mammalian central nervous system. *Ann Rev*  
760 *Physiol* 41:159-177.
- 761 Somjen GG (2001) Mechanisms of Spreading Depression and Hypoxic Spreading Depression-  
762 Like Depolarization. *Physiol Rev* 81:1065-1096.

- 763 Somjen GG (2002) Ion Regulation in the Brain: Implications for Pathophysiology. The  
764 Neuroscientist 8:14.
- 765 Soofi W, Goeritz ML, Kispersky TJ, Prinz AA, Marder E, Stein W (2014) Phase maintenance in a  
766 rhythmic motor pattern during temperature changes *in vivo*. J Neurophysiol 111:2603-  
767 2613.
- 768 Stein W, DeLong ND, Wood DE, Nusbaum MP (2007) Divergent co-transmitter actions underlie  
769 motor pattern activation by a modulatory projection neuron. Eur J Neurosci 26:1148-  
770 1165.
- 771 Swensen AM, Bean BP (2005) Robustness of burst firing in dissociated Purkinje neurons with  
772 acute or long-term reductions in sodium conductance. J Neurosci 25:3509-3520.
- 773 Tang LS, Taylor AL, Rinberg A, Marder E (2012) Robustness of a rhythmic circuit to short- and  
774 long-term temperature changes. J Neurosci 32:10075-10085.
- 775 Tang LS, Goeritz ML, Caplan JS, Taylor AL, Fisek M, Marder E (2010) Precise temperature  
776 compensation of phase in a rhythmic motor pattern. PLoS Biol 8:e1000469.
- 777 Taylor AL, Goaillard J-M, Marder E (2009) How multiple conductances determine  
778 electrophysiological properties in a multicompartment model. J Neurosci 29:5573-5586.
- 779 Temporal S, Lett KM, Schulz DJ (2014) Activity-dependent feedback regulates correlated ion  
780 channel mRNA levels in single identified motor neurons. Curr Biol 24:1899-1904.
- 781 Thoby-Brisson M, Simmers J (1998) Neuromodulatory inputs maintain expression of a lobster  
782 motor pattern-generating network in a modulation-dependent state: evidence from  
783 long-term decentralization in vitro. J Neurosci 18:2212-2225.

- 784 Thoby-Brisson M, Simmers J (2002) Long-Term Neuromodulatory Regulation of a Motor  
785 Pattern-Generating Network: Maintenance of Synaptic Efficacy and Oscillatory  
786 Properties. *J Neurophysiol* 88:2942-2953.
- 787 Tornqvist K, Yang X, Dowling J (1988) Modulation of cone horizontal cell activity in the teleost  
788 fish retina. III. Effects of prolonged darkness and dopamine on electrical coupling  
789 between horizontal cells. *J Neurosci* 8:2279-2288.
- 790 Tran T, Unal CT, Severin D, Zaborszky L, Rotstein HG, Kirkwood A, Golowasch J (2019) Ionic  
791 current correlations are ubiquitous across phyla. *Sci Rep* 9:1687.
- 792 Turrigiano G (2012) Homeostatic synaptic plasticity: local and global mechanisms for stabilizing  
793 neuronal function. *Cold Spring Harb Perspect Biol* 4:a005736.
- 794 Von Euler C (1983) On the central pattern generator for the basic breathing rhythmicity. *J Appl*  
795 *Physiol* 55:1647-1659.
- 796 Wood DE, Stein W, Nusbaum MP (2000) Projection neurons with shared cotransmitters elicit  
797 different motor patterns from the same neural circuit. *J Neurosci* 20:8943-8953.
- 798
- 799

800 FIGURE LEGENDS

801

802 **Figure 1. The pyloric rhythm is disrupted by large changes in extracellular**

803 **[K<sup>+</sup>].** The pyloric rhythm remains robust when exposed to 1.5x[K<sup>+</sup>] saline and is

804 disrupted at higher [K<sup>+</sup>]. (A) Diagram of the dissected stomatogastric nervous system

805 (STNS). The entire STNS was superfused with saline with altered [K<sup>+</sup>]. (B) The triphasic

806 pyloric rhythm is illustrated in an extracellular recording from *lvn*, which contains

807 axons from LP, PY and PD neurons. (C) Connectivity diagram of the pyloric circuit of

808 the crab *Cancer borealis*. (D - G) *lvn* recordings of spiking activity during application of

809 elevated [K<sup>+</sup>] saline (green boxes) in concentrations of 1.5x, 2.0x, 2.5x and 3.0x the

810 physiological concentration of potassium.

811

812 **Figure 2. Representative activity of pyloric circuit neurons, pyloric dilator**

813 **(PD) and lateral pyloric (LP) neurons 2.5x[K<sup>+</sup>] saline.** Green shaded boxes

814 indicate the period of 2.5x[K<sup>+</sup>] saline superfusion. (A) 3-second segments of PD and LP

815 activity (i-v) are shown in physiological saline, 10, 20 and 70 min into application of

816 2.5x[K<sup>+</sup>] saline and upon return to physiological saline. (B) Voltage trace of a PD

817 neuron's activity for the entire representative experiment. (C) Interspike intervals of the

818 PD neuron's activity over the course of 2.5x[K<sup>+</sup>] saline application. ISIs are plotted on a

819 log scale, with the presence of only one band indicating a tonic firing regime and two

820 bands indicating bursting activity. (D) Spectrogram of the PD neuron's voltage trace.

821 The color code in each spectrogram represents the amplitude density. (E) Mean

822 minimum membrane potential of all PD neurons in five-minute bins for each

823 preparation. (F) Average change in PD neurons' minimum membrane potential

824 compared to baseline in five-minute bins for all preparations. Error bars represent  
825 standard deviations. Minimum membrane potential increased significantly when  
826  $2.5x[K^+]$  saline was applied (repeated measures ANOVA, Tukey post-hoc  $p < 0.05$ ), but  
827 did not change significantly between 10 and 90 minutes in  $2.5x[K^+]$  (n.s., all  $p > 0.05$ ).  
828 The PD minimum membrane potential returned to baseline levels in wash of  
829 physiological saline (n.s., baseline compared to wash, all  $p > 0.05$ ).

830

831 **Figure 3. Responses to  $2.5x[K^+]$  saline are highly variable across**  
832 **preparations.** Shaded green boxes indicate the period of  $2.5x[K^+]$  saline superfusion.  
833 Example traces of PD neurons from four different preparations (A-D) with a  
834 characteristic crash and recovery of activity in  $2.5x[K^+]$  saline are shown along with the  
835 corresponding log(ISIs) for each preparation. (E) Time to recovery of activity in PD  
836 neurons is not correlated to the baseline minimum membrane potential ( $R^2 = 0.203$ ),  
837 (F) the change in minimum membrane potential when  $2.5x[K^+]$  is applied ( $R^2 = 0.104$ ),  
838 or (G) the burst frequency of the PD neuron at baseline conditions ( $R^2 = 0.012$ ).

839

840 **Figure 4. The representative activity of a PD neuron with presynaptic**  
841 **glutamatergic synapses blocked with picrotoxin (PTX) in  $2.5x[K^+]$  saline.**

842 (A) Connectivity diagram of the pyloric network with picrotoxin (PTX) blocking  
843 glutamatergic signaling. (B) 3-second segments of PD activity (i-vi) in physiological  
844 saline, 20 min into application of  $10^{-5}M$  PTX saline, and at 10, 20 and 70 min into  
845 application of  $2.5x[K^+]$  PTX saline and upon return to physiological saline (C). Voltage  
846 trace of the PD neuron over the entire experiment. The blue shaded boxes indicate time  
847 of  $10^{-5}M$  PTX saline superfusion, and the green shaded box indicates the 90-minute



848 period of 2.5x[K<sup>+</sup>] PTX saline superfusion. This color scheme is maintained D, F, and G.  
849 (D) ISIs over the course of the experiment plotted on a log scale, with the presence of  
850 one band indicating a tonic firing regime and two bands indicating bursting activity. (E)  
851 Spectrogram of PD neuron's voltage trace. The color code reflects the amplitude density.  
852 (F) Mean minimum membrane potential of all PTX(+) PD neurons in five-minute bins  
853 for each preparation. (G) Average change in PD neurons' minimum membrane potential  
854 in five-minute bins compared to baseline for all preparations. Error bars represent  
855 standard deviations. Minimum membrane potential increases significantly when  
856 2.5x[K<sup>+</sup>] PTX saline is applied (repeated measures ANOVA, Tukey post-hoc comparing  
857 baseline to 2.5x[K<sup>+</sup>], all  $p < 0.05$ ) but does not change significantly after 10 minutes in  
858 2.5x[K<sup>+</sup>] PTX for the duration of the elevated [K<sup>+</sup>] application (n.s., all  $p > 0.05$ ). The  
859 minimum membrane potential returned to baseline levels in wash of physiological  
860 saline (n.s., baseline compared to wash, all  $p > 0.05$ ).

861  
862 **Figure 5. PD neurons respond differently to 2.5x[K<sup>+</sup>] saline in the presence**  
863 **and absence of PTX.** (A) Activity patterns of PD neurons in control conditions  
864 exposed to 2.5x[K<sup>+</sup>] saline. (B) Activity patterns of PTX(+)PD neurons exposed to  
865 2.5x[K<sup>+</sup>] PTX saline. (C) Control PD neurons exhibit a longer period of silence upon  
866 2.5x[K<sup>+</sup>] saline application compared to PD neurons in PTX (Wilcoxon rank-sum test  $p$   
867 = 0.0129). (D) Control PD neurons exhibit a longer period of sparse firing upon 2.5x[K<sup>+</sup>]  
868 saline application compared to PD neurons in PTX (Wilcoxon rank-sum test  $p = 0.034$ ).  
869 (E) Control PD neurons do not show significant differences in the amount of time in  
870 tonic firing (n.s.,  $p = 0.77$ ) or in (F) burst firing upon 2.5x[K<sup>+</sup>] saline application  
871 compared to PD neurons in PTX (n.s.,  $p = 0.51$ ).

872

873 **Figure 6. Action potential thresholds rapidly change in PD neurons during**  
874 **exposure to 2.5x[K<sup>+</sup>].** (A) Two-electrode current clamp was used to inject current  
875 ramps from -4nA to +2nA over 60 seconds. Representative activity during ramps from a  
876 PD neuron in 2.5x[K<sup>+</sup>] at 5, 10, 40, and 80 minutes after the onset of 2.5x[K<sup>+</sup>] saline  
877 application. (B) From the representative neuron shown in A, for each ramp in 2.5x[K<sup>+</sup>]  
878 saline, the average firing frequencies in 5-second bins are plotted against the average  
879 membrane potential of the corresponding bin. For C, D and E, green boxes indicate time  
880 of 2.5x[K<sup>+</sup>] saline superfusion, and blue boxes indicate time of PTX superfusion. (C) PD  
881 neuron spike thresholds for each ramp are plotted for each preparation (different  
882 colors) in the absence of PTX. (D) PD neuron spike thresholds for each ramp plotted for  
883 each preparation in PTX. (E) Percent change in the spike threshold over the course of  
884 the experiment (as compared to the last baseline ramp) for PD neurons in the presence  
885 and absence of PTX. Error bars are SEM, one-way ANOVA with Tukey Post-Hoc test (\*  
886 =  $p < 0.05$ , all comparisons between brackets). (F) Average F-I curves for PD neurons  
887 (solid lines) and PD neurons in PTX (dashed lines) at five minutes after the onset of  
888 2.5x[K<sup>+</sup>] saline application (purple lines) and at 90 minutes after the onset of 2.5x[K<sup>+</sup>]  
889 saline application (red lines). There was a significant difference between the F-I curve  
890 for control PD neurons between the 5- and 90-minute time points (Two-way repeated  
891 measures ANOVA,  $p = 0.009$ ). In addition, there was a significant difference in the F-I  
892 curves of PTX(+) and PTX(-) PD neurons after 5 minutes in 2.5x[K<sup>+</sup>] saline (Two-way  
893 repeated measures ANOVA,  $p = 0.036$ ).

**A** Stomatogastric Nervous System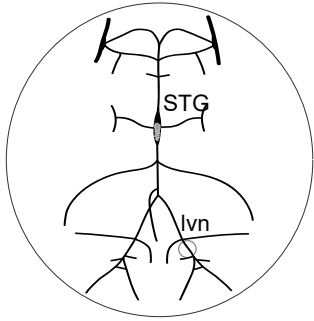**B**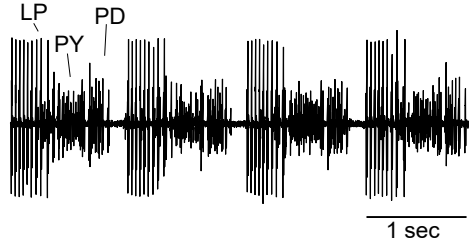**C**

## Intact pyloric circuit

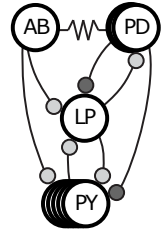**D**

Normal saline

5 min in high  $[K^+]$  saline30 min in high  $[K^+]$  saline55 min in high  $[K^+]$  saline10 min after washout of high  $[K^+]$  saline1.5x $[K^+]$  saline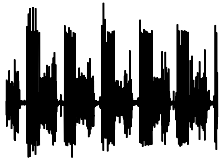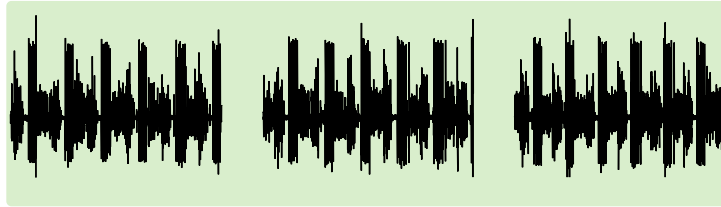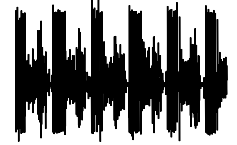2x $[K^+]$  saline**E**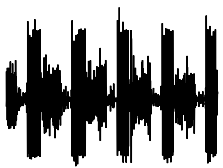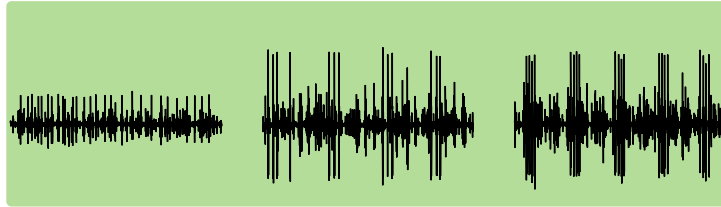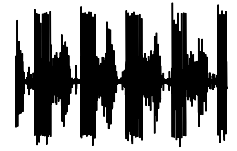2.5x $[K^+]$  saline**F**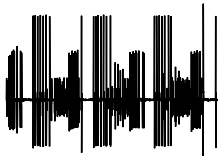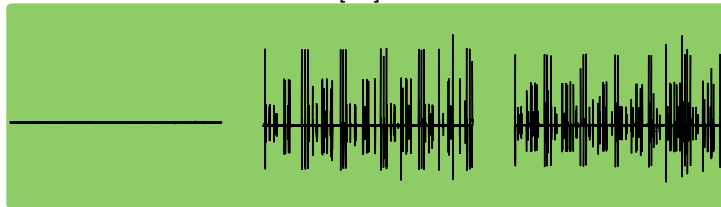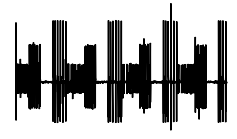3x $[K^+]$  saline**G**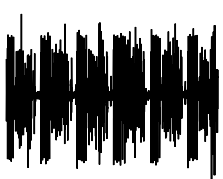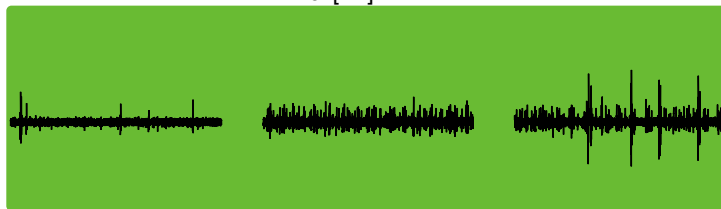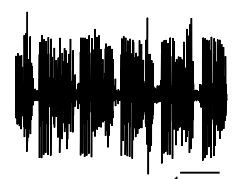

Figure 1

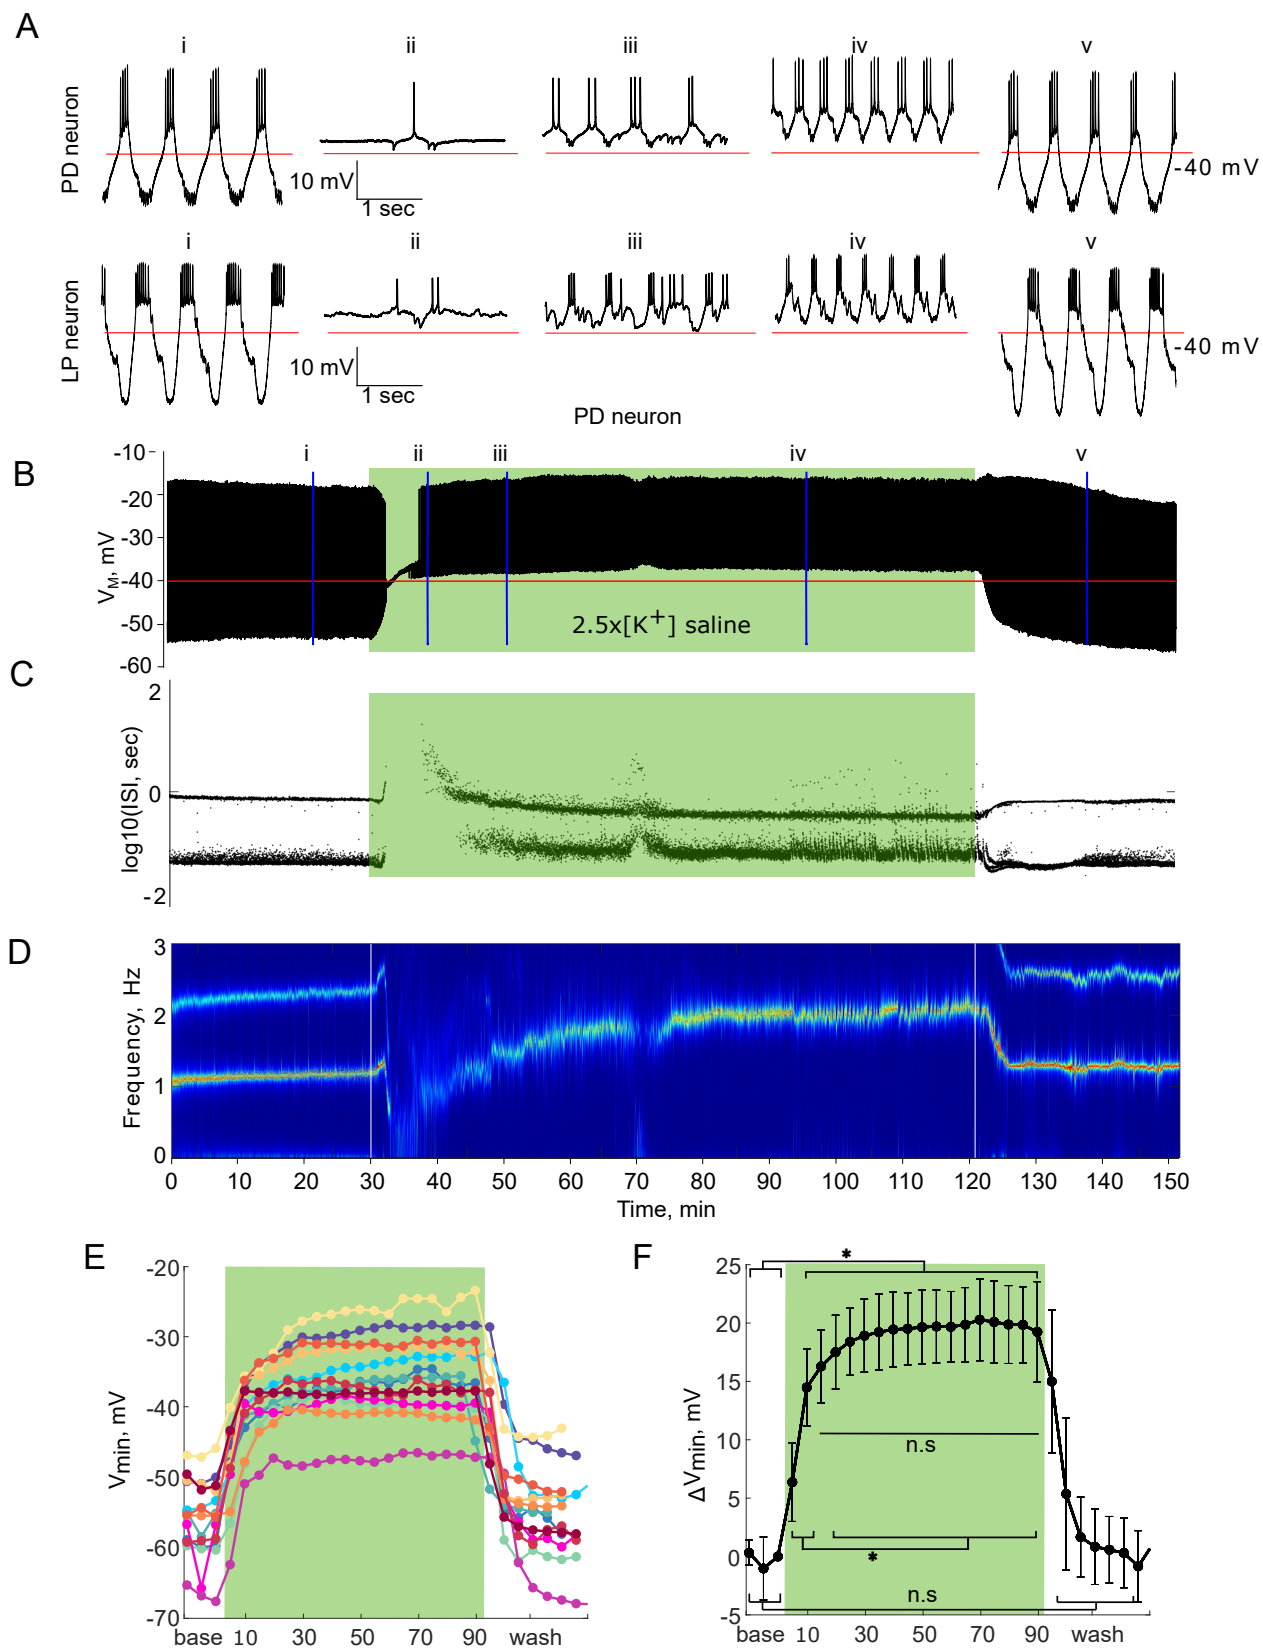

Figure 2

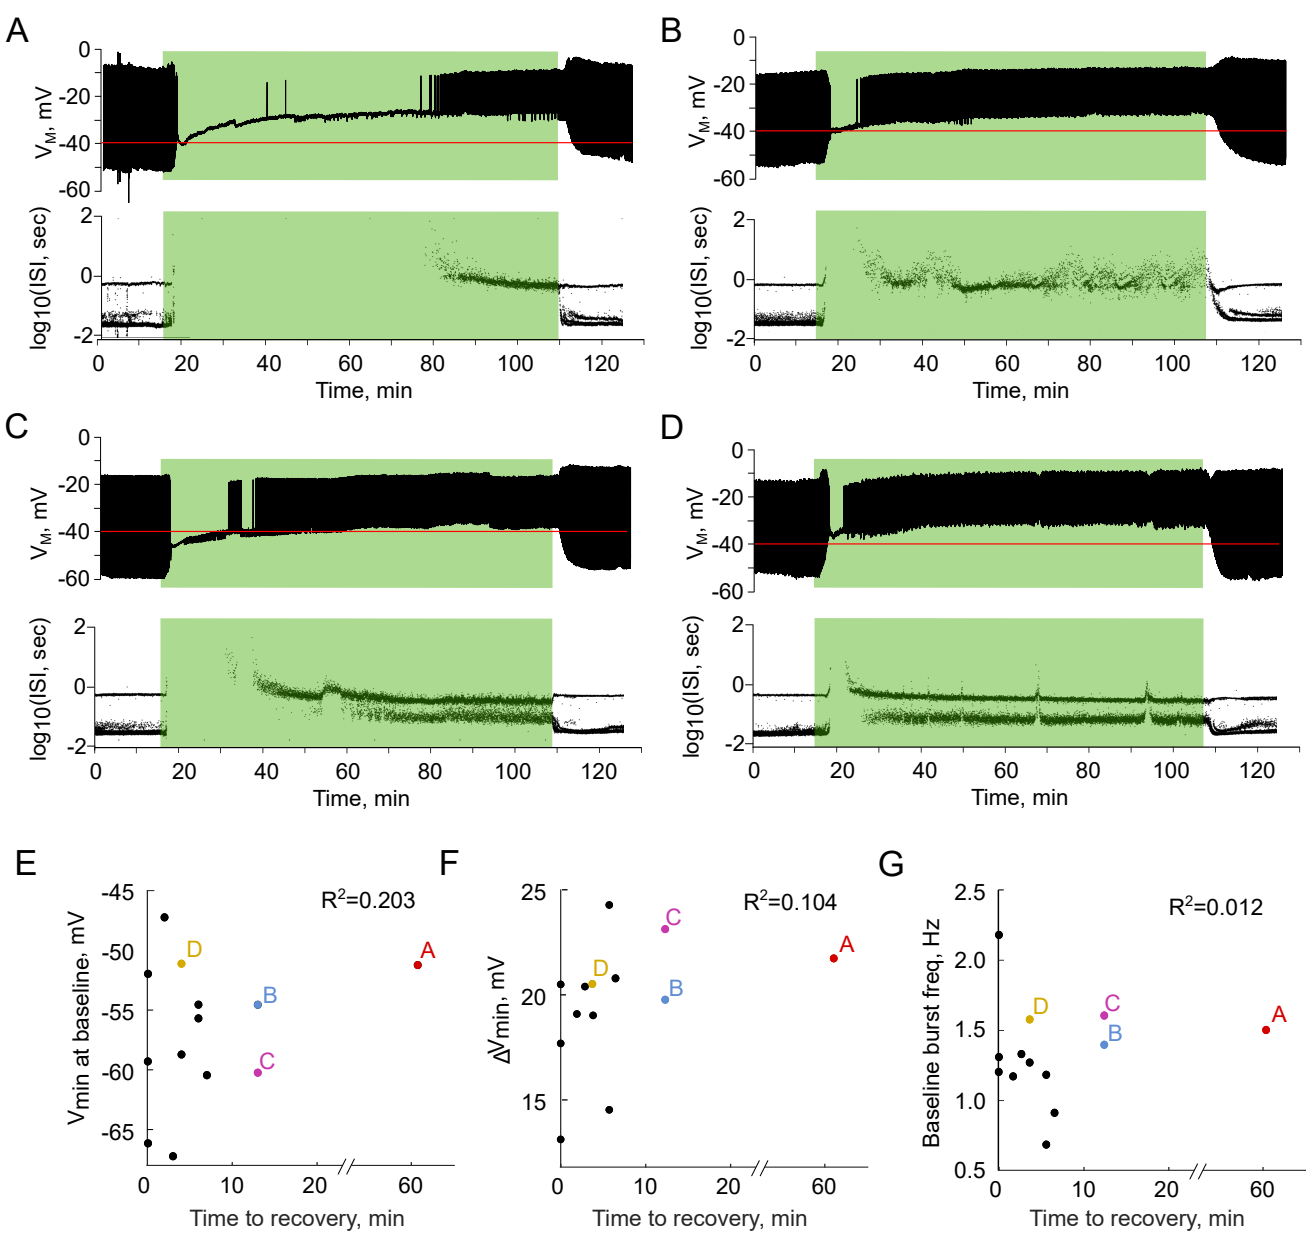

Figure 3

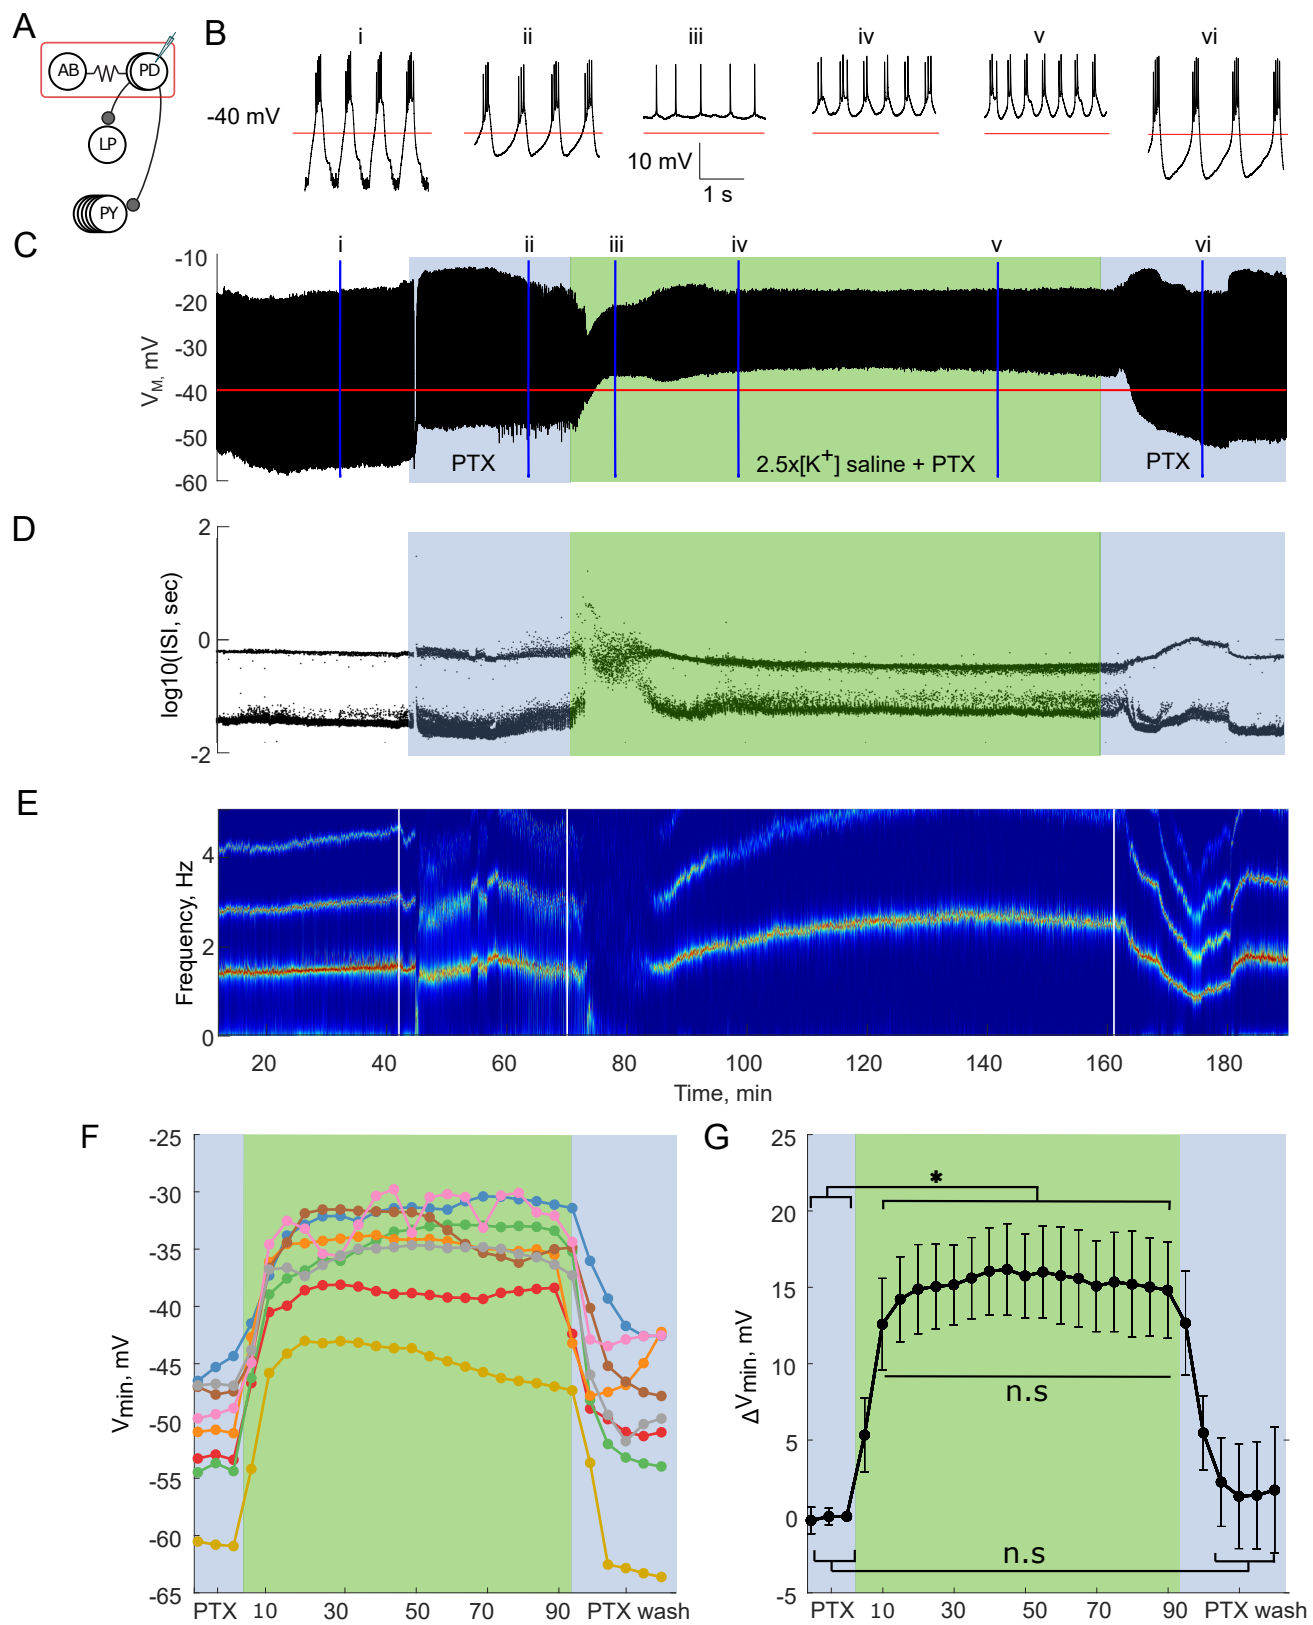

Figure 4

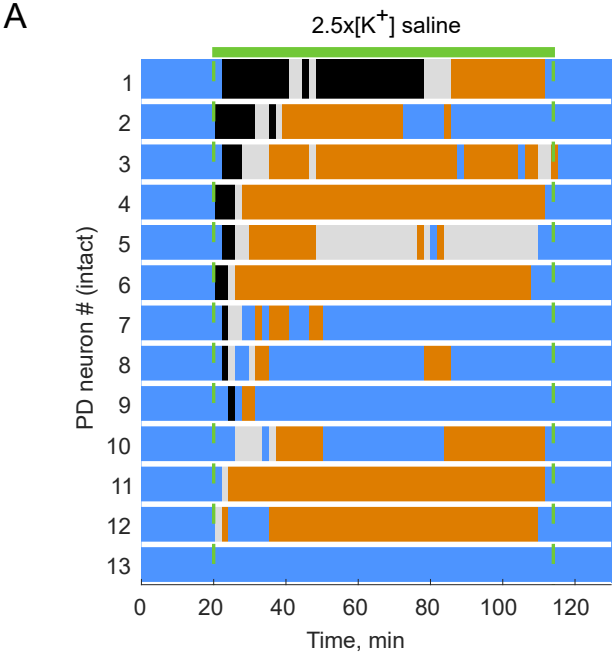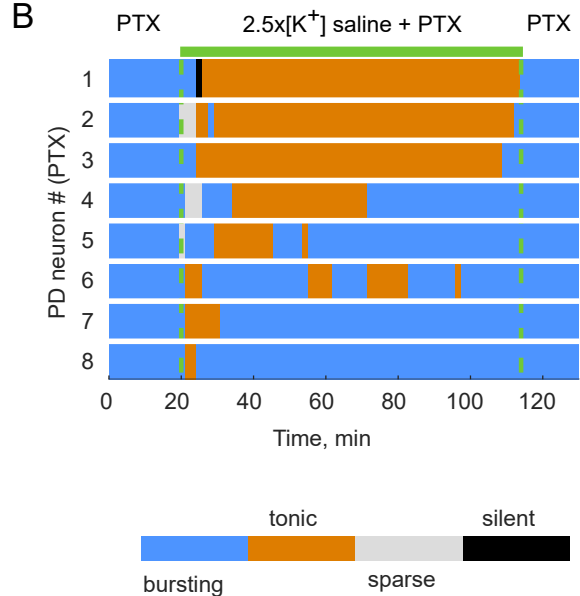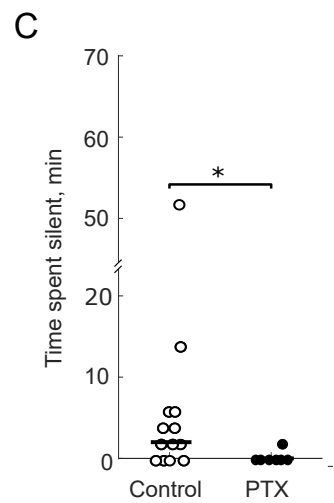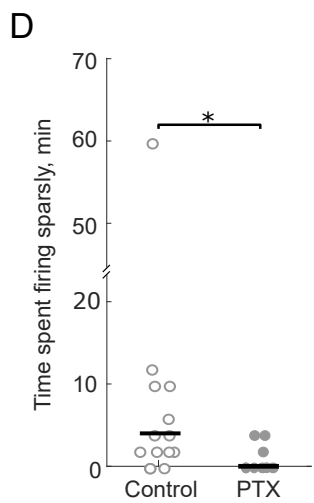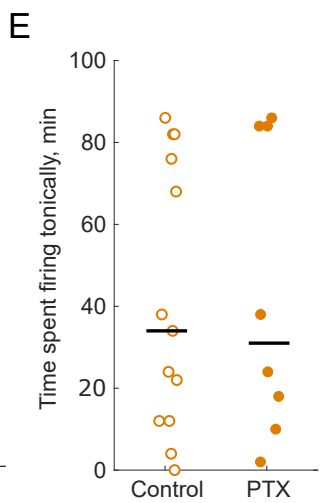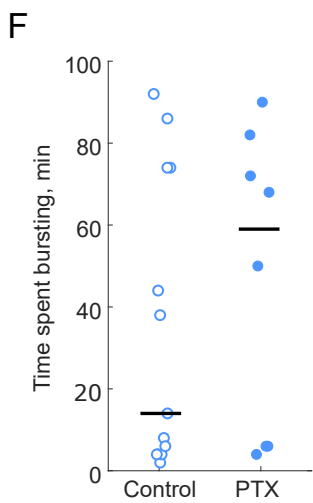

Figure 5

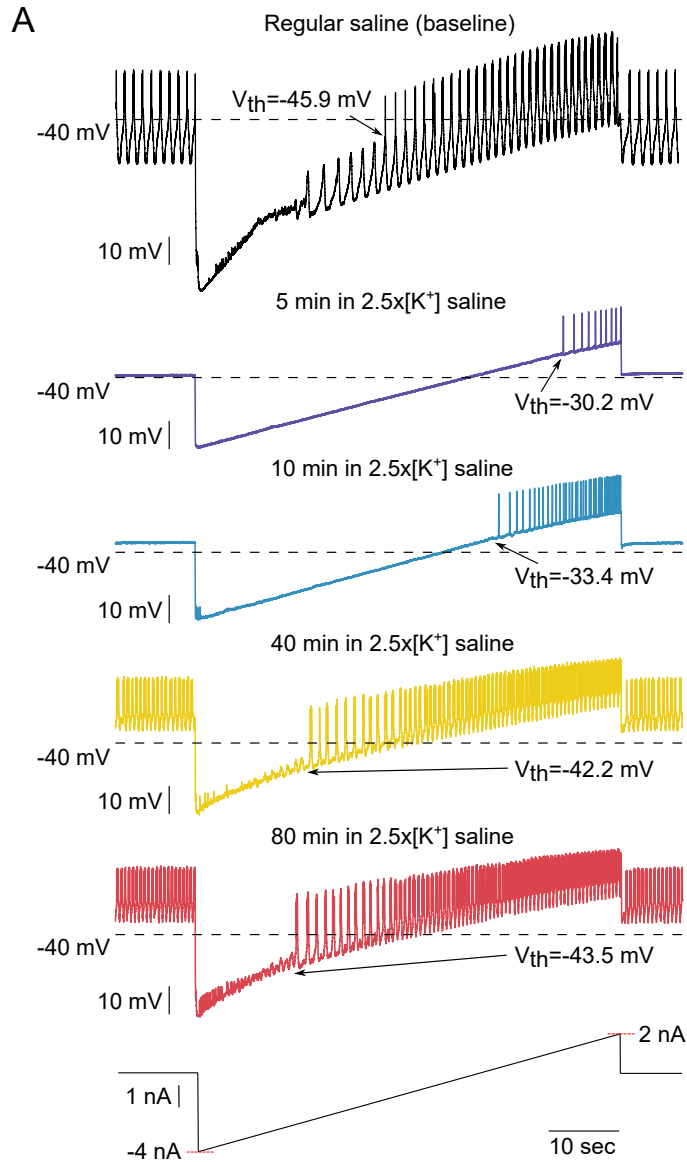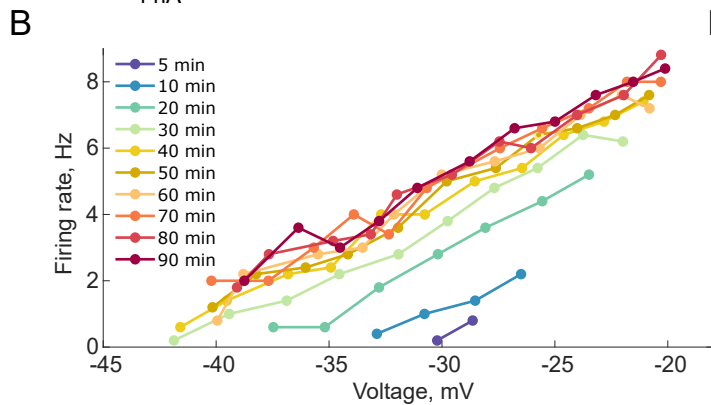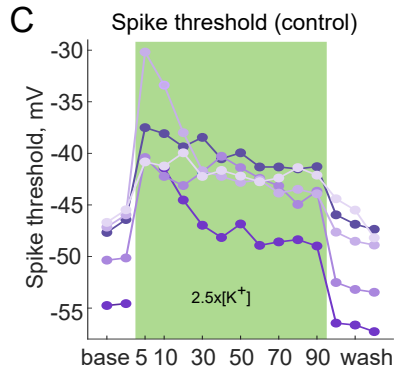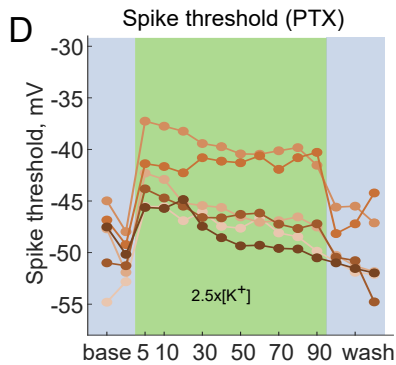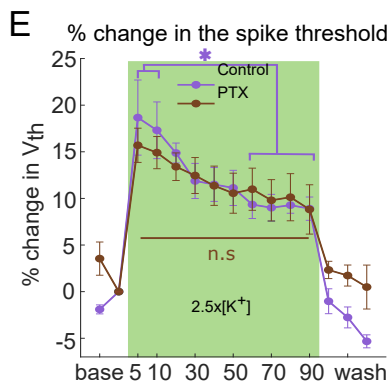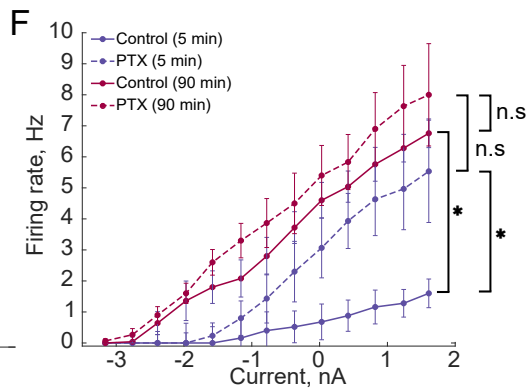

Figure 6
